# 1 Nucleotide-resolution bacterial pan-genomics with reference graphs

2 Rachel M Colquhoun<sup>1,2,3</sup>, Michael B Hall<sup>1</sup>, Leandro Lima<sup>1</sup>, Leah W Roberts<sup>1</sup>, Kerri M  
3 Malone<sup>1</sup>, Martin Hunt<sup>1,4</sup>, Brice Letcher<sup>1</sup>, Jane Hawkey<sup>5</sup>, Sophie George<sup>4</sup>, Louise Pankhurst<sup>3,6</sup>,  
4 Zamin Iqbal<sup>1,\*</sup>

## 5 Affiliations:

- 6 1. European Bioinformatics Institute, Hinxton, Cambridge CB10 1SD, UK
- 7 2. Wellcome Trust Centre for Human Genetics, University of Oxford, Roosevelt Drive, Oxford, UK
- 8 3. Institute of Evolutionary Biology, Ashworth Laboratories, University of Edinburgh, UK
- 9 4. Nuffield Department of Medicine, University of Oxford, Oxford, UK
- 10 5. Department of Infectious Diseases, Central Clinical School, Monash University, Melbourne, Victoria
- 11 3004, Australia
- 12 6. Department of Zoology, Mansfield Road, University of Oxford

13 \* corresponding author, email [zi@ebi.ac.uk](mailto:zi@ebi.ac.uk)

## 14 Abstract

### 15 Background

16 Bacterial genomes follow a U-shaped frequency distribution whereby most genomic loci are  
17 either rare (accessory) or common (core); the union of these is the pan-genome. The  
18 alignable fraction of two genomes from a single species can be low (e.g. 50-70%), such that  
19 no single reference genome can access all single nucleotide polymorphisms (SNPs). The  
20 pragmatic solution is to choose a close reference, and analyse SNPs only in the core  
21 genome. Given much bacterial adaptability hinges on the accessory genome, this is an  
22 unsatisfactory limitation.

### 23 Results

24 We present a novel pan-genome graph structure and algorithms implemented in the  
25 software *pandora*, which approximates a sequenced genome as a recombinant of reference  
26 genomes, detects novel variation and then pan-genotypes multiple samples. The method  
27 takes fastq as input and outputs a multi-sample VCF with respect to an inferred  
28 data-dependent reference genome, and is available at <https://github.com/rmcolq/pandora>.

29 Constructing a reference graph from 578 *E. coli* genomes, we analyse a diverse set of 20 *E.*  
30 *coli* isolates. We show *pandora* recovers at least 13k more rare SNPs than single-reference  
31 based tools, achieves equal or better error rates with Nanopore as with Illumina data, 6-24x  
32 lower Nanopore error rates than other tools, and provides a stable framework for analysing  
33 diverse samples without reference bias. We also show that our inferred recombinant VCF  
34 reference genome is significantly better than simply picking the closest RefSeq reference.

### 35 Conclusions

36 This is a step towards comprehensive cohort analysis of bacterial pan-genomic variation,  
37 with potential impacts on genotype/phenotype and epidemiological studies.

## 1 **Keywords**

2 Pan-genome, genome graph, accessory genome, Nanopore

## 3 **Background**

4 Bacterial genomes evolve by multiple mechanisms including: mutation during replication,  
5 allelic and non-allelic homologous recombination. These processes result in a population of  
6 genomes that are mosaics of each other. Given multiple contemporary genomes, the  
7 segregating variation between them allows inferences to be made about their evolutionary  
8 history. These analyses are central to the study of bacterial genomics and evolution(1–4)  
9 with different questions requiring focus on separate aspects of the mosaic: fine-scale  
10 (mutations) or coarse (gene presence, synteny). In this paper, we provide a new and  
11 accessible conceptual model that combines both fine and coarse bacterial variation. Using  
12 this new understanding to better represent variation, we can access previously hidden single  
13 nucleotide polymorphisms (SNPs), insertions and deletions (indels).

14 Genes cover 85-90% of bacterial genomes(5), and shared gene content is commonly used  
15 as a measure of whole-genome similarity. In fact, the full set of genes present in a species -  
16 the *pan-genome* - is in general much larger than the number found in any single genome. A  
17 frequency distribution plot of genes within a set of bacterial genomes has a characteristic  
18 asymmetric U-shaped curve (6–10), as shown in Figure 1a. As a result, a collection of  
19 *Escherichia coli* genomes might only have 50% of their genes (and therefore their whole  
20 genome)(3) in common. This highlights a limitation in the standard approach to analysing  
21 genetic variation, whereby a single genome is treated as a reference, and all other genomes  
22 are interpreted as differences from it. In bacteria, a single reference genome will inevitably  
23 lack many of the genes in the pan-genome, and completely miss genetic variation therein  
24 (Figure 1b). We call this *hard reference bias*, to distinguish from the more common concern,  
25 that increased divergence of a reference from the genome under study leads to  
26 read-mapping problems, which we term *soft reference bias*. The standard workaround for  
27 these issues in bacterial genomics is to restrict analysis either to very similar genomes using  
28 a closely related reference (e.g. in an outbreak) or to analyse SNPs only in the core genome  
29 (present in most samples) and outside the core to simply study presence/absence of  
30 genes(11).

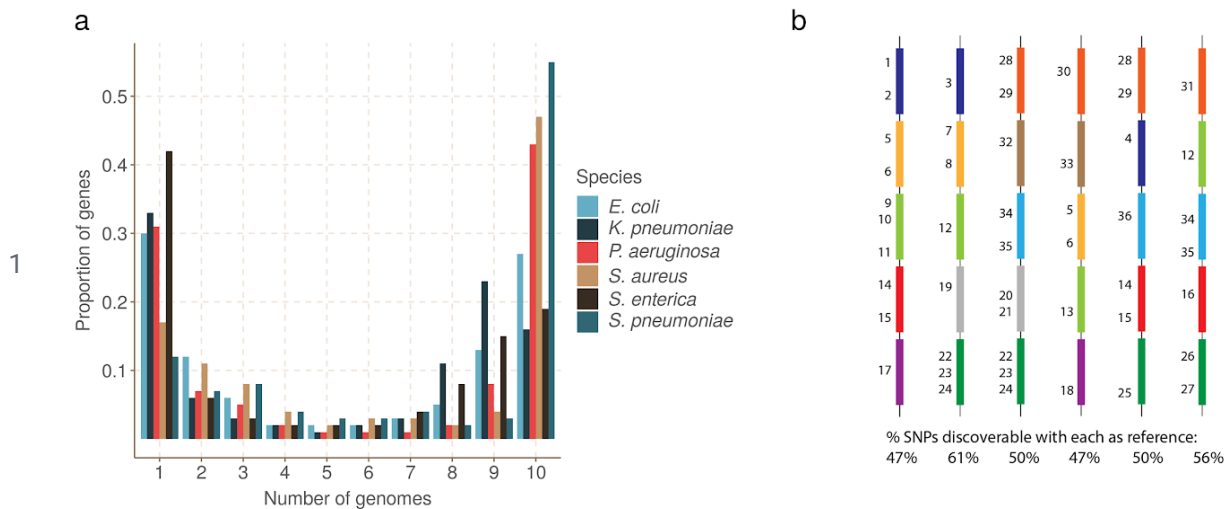

2 **Figure 1. Universal gene frequency distribution in bacteria and the single-reference**  
3 **problem.** a) Frequency distribution of genes in 10 genomes of 6 bacterial species  
4 (*Escherichia coli*, *Klebsiella pneumoniae*, *Pseudomonas aeruginosa*, *Staphylococcus*  
5 *aureus*, *Salmonella enterica* and *Streptococcus pneumoniae*) showing the characteristic  
6 U-shaped curve - most genes are rare or common. b) Illustrative depiction of the  
7 single-reference problem, a consequence of the U-shaped distribution. Each vertical column  
8 is a bacterial genome, and each coloured bar is a gene. Numbers are identifiers for SNPs -  
9 there are 50 in total. Thus the dark blue gene has 4 SNPs numbers 1-4. This figure does not  
10 detail which genome has which allele. Below each column is the proportion of SNPs that are  
11 discoverable when that genome is used as a reference genome. Because no single  
12 reference contains all the genes in the population, it can only access a fraction of the SNPs.

13 In this study we address the variation deficit caused by a single-reference approach. Given  
14 Illumina or Nanopore sequence data from potentially divergent isolates of a bacterial  
15 species, we attempt to detect all of the variants between them. Our approach is to  
16 decompose the pan-genome into atomic units (loci) which tend to be preserved over  
17 evolutionary timescales. Our loci are genes and intergenic regions in this study, but the  
18 method is agnostic to such classifications, and one could add any other grouping wanted  
19 (e.g. operons or mobile genetic elements). Instead of using a single genome as a reference,  
20 we collect a panel of representative reference genomes and use them to construct a set of  
21 reference graphs, one for each locus. Reads are mapped to this set of graphs and from this  
22 we are able to discover and genotype variation. By letting go of prior information on locus  
23 ordering in the reference panel, we are able to recognise and genotype variation in a locus  
24 regardless of its wider context. Since Nanopore reads are typically long enough to  
25 encompass multiple loci, it is possible to subsequently infer the order of loci - although that is  
26 outside the scope of this study.

27 The use of graphs as a generalisation of a linear reference is an active and maturing  
28 field(12–19). Much recent graph genome work has gone into showing that genome graphs  
29 reduce the impact of soft reference bias on mapping(12), and on generalising alignment to  
30 graphs(16,20). However there has not yet been any study (to our knowledge) addressing  
31 SNP analysis across a diverse cohort, including more variants that can fit on any single

1 reference. In particular, all current graph methods require a reference genome to be  
2 provided in advance to output genetic variants in the standard Variant Call Format (VCF)(21)  
3 - thus immediately inheriting a hard bias when applied to bacteria (see Figure 1b).

4 We have made a number of technical innovations. First, a recursive clustering algorithm that  
5 converts a multiple sequence alignment (MSA) of a locus into a graph. This avoids the  
6 complexity “blowups” that plague graph genome construction from unphased VCF  
7 files(12,14). Second, a graph representation of genetic variation based on  
8 (w,k)-minimizers(22). Third, using this representation we avoid unnecessary full alignment to  
9 the graph and instead use quasi-mapping to genotype on the graph. Fourth, discovery of  
10 variation missing from the reference graph using local assembly. Fifth, use of a canonical  
11 dataset-dependent reference genome designed to maximise clarity of description of variants  
12 (the value of this will be made clear in the main text).

13 We describe these below, and evaluate our implementation, *pandora*, on a diverse set of *E.*  
14 *coli* genomes with both Illumina and Nanopore data. We show that, compared with  
15 reference-based approaches, *pandora* recovers a significant proportion of the missing  
16 variation in rare loci, performs much more stably across a diverse dataset, successfully  
17 infers a better reference genome for VCF output, and outperforms current tools for Nanopore  
18 data.

## 19 Results:

### 20 Pan-genome graph representation

21 We set out to define a generalised reference structure which allows detection of SNPs and  
22 other variants across the whole pan-genome, without attempting to record long-range  
23 structure or coordinates. We define a *Pan-genome Reference Graph* (PanRG) as an  
24 unordered collection of sequence graphs, termed *local graphs*, each of which represents a  
25 locus, such as a gene or intergenic region. Each local graph is constructed from a MSA of  
26 known alleles of this locus, using a recursive cluster-and-collapse (RCC) algorithm  
27 (Supplementary Animation 1: recursive clustering construction). The output is guaranteed to  
28 be a directed acyclic sequence graph allowing hierarchical nesting of genetic variation while  
29 meeting a “balanced parentheses” criterion (see Figure 2b and Methods). Each path through  
30 the graph from source to sink represents a possible recombinant sequence for the locus.  
31 The disjoint nature of this pan-genome reference allows loci such as genes to be compared  
32 regardless of their wider genomic context. We implement this construction algorithm in the  
33 *make\_prg* tool which outputs the graph as a file (see Figures 2a-c, Methods). Subsequent  
34 operations, based on this, are implemented in the software package *pandora*. The overall  
35 workflow is shown in Figure 2.

36 To index a PanRG, we generalise a type of sparse marker k-mer ((w,k)-minimizer),  
37 previously defined for strings, to directed acyclic graphs (see Methods). Each local graph is  
38 *sketched* with minimizing k-mers, and these are then used to construct a new graph (the

- 1 k-mer graph) for each local graph from the PanRG. Each minimizing k-mer is a node, and
  - 2 edges are added between two nodes if they are adjacent minimizers on a path through the
  - 3 original local graph. This k-mer graph is isomorphic to the original if  $w \leq k$  (and outside the
  - 4 first and last  $w+k-1$  bases); all subsequent operations are performed on this graph, which, to
  - 5 avoid unnecessary new terminology, we also call the local graph.
- 6 A global index maps each minimizing k-mer to a list of all local graphs containing that k-mer
  - 7 and the positions therein. Long or short reads are approximately mapped (*quasi-mapped*) to
  - 8 the PanRG by determining the minimizing k-mers in each read. Any of these read
  - 9 quasi-mappings found in a local graph are called *hits*, and any local graph with sufficient
  - 10 clustered hits on a read is considered present in the sample.

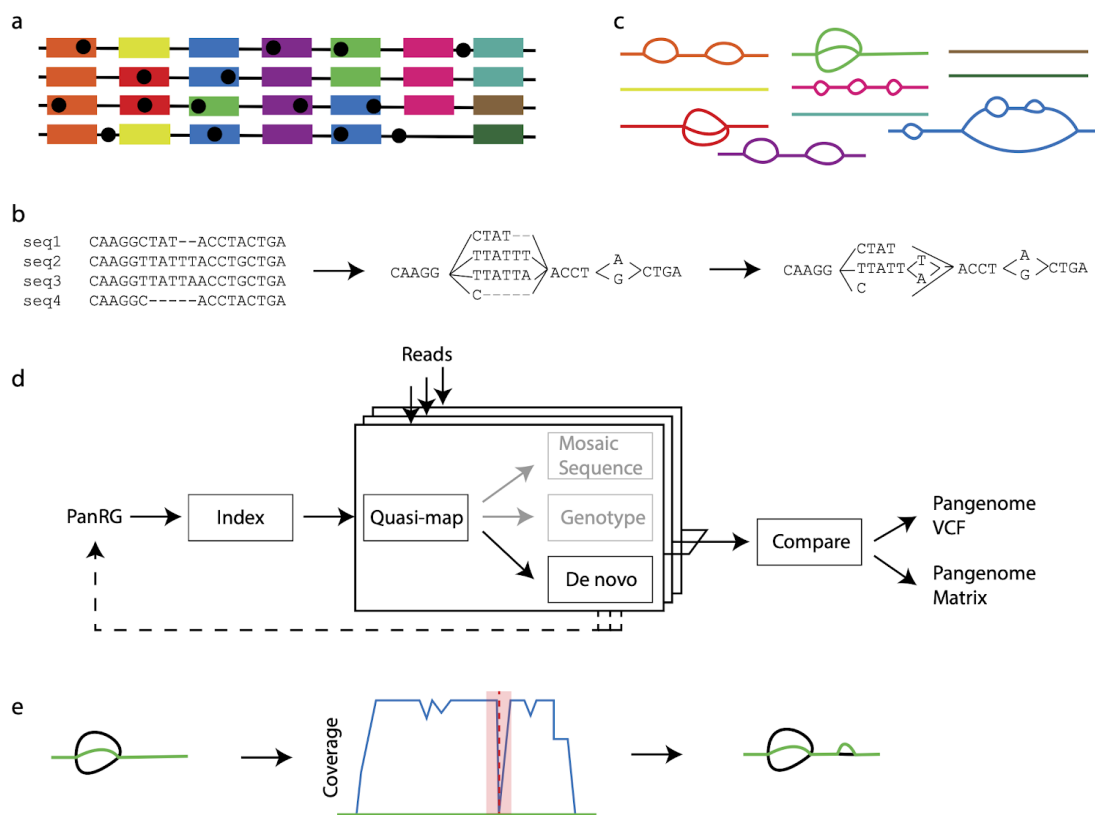

11 **Figure 2. The *pandora* workflow.** a) reference panel of genomes; colour signifies locus  
 12 (gene or intergenic region) identifier, and blobs are SNPs. b) multiple sequence alignments  
 13 (MSAs) for each locus are made and converted into a directed acyclic graph. c) local graphs  
 14 constructed from the loci in the reference panel. d) Workflow: the collection of local graphs,  
 15 termed the PanRG, is indexed. Reads from each sample under study are independently  
 16 quasi-mapped to the graph, and a determination is made as to which loci are present in  
 17 each sample. In this process, for each locus, a mosaic approximation of the sequence for  
 18 that sample is inferred, and variants are genotyped. e) regions of low coverage are detected,  
 19 and local de novo assembly is used to generate candidate novel alleles missing from the

1 *graph. Returning to d), the dotted line shows all the candidate alleles from all samples are*  
2 *then gathered and added to the MSAs at the start, and the PanRG is updated. Then, reads*  
3 *are quasi-mapped one more time, to the augmented PanRG, generating new mosaic*  
4 *approximations for all samples and storing coverages across the graphs; no de novo*  
5 *assembly is done this time. Finally, all samples are compared, and a VCF file is produced,*  
6 *with a per-locus reference that is inferred by pandora.*

## 7 Initial sequence approximation as a mosaic of references

8 For each locus identified as present in a sample, we initially approximate the sample's  
9 sequence as a path through the local graph. The result is a mosaic of sequences from the  
10 reference panel. This path is chosen to have maximal support by reads, using a dynamic  
11 programming algorithm on the graph induced by its (w,k)-minimizers (details in Methods).  
12 The result of this process serves as our initial approximation to the genome under analysis.

## 13 Improved sequence approximation: modify mosaic by local assembly

14 At this point, we have quasi-mapped reads, and approximated the genome by finding the  
15 closest mosaic in the graph; however, we expect the genome under study to contain variants  
16 that are not present in the PanRG. Therefore, to allow discovery of novel SNPs and small  
17 indels that are not in the graph, for each sample and locus we identify regions of the inferred  
18 mosaic sequence where there is a drop in read coverage (as shown in Figure 2e). Slices of  
19 overlapping reads are extracted, and a form of *de novo* assembly is performed using a de  
20 Bruijn graph. Instead of trying to find a single correct path, the de Bruijn graph is traversed  
21 (see Methods for details) to all feasible candidate novel alleles for the sample. These alleles  
22 are added to the reference MSA for the locus, and the local graph is updated. If comparing  
23 multiple samples, the graphs are augmented with all new alleles from all samples at the  
24 same time.

## 25 Optimal VCF-reference construction for multi-genome comparison

26 In the *compare* step of *pandora* (see Figure 2d), we enable continuity of downstream  
27 analysis by outputting genotype information in the conventional VCF(21). In this format, each  
28 row (record) describes possible alternative allele sequence(s) at a position in a (single)  
29 reference genome and information about the type of sequence variant. A column for each  
30 sample details the allele seen in that sample, often along with details about the support from  
31 the data for each allele.



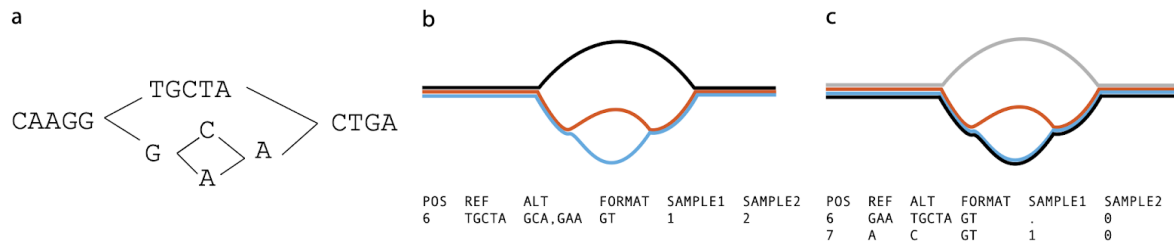

1 **Figure 3. The representation problem.** a) a local graph. b) The black allele is chosen as  
2 reference to enable representation in VCF. The blue/red SNP then requires flanking  
3 sequence in order to allow it to have a coordinate. The SNP is thus represented as two ALT  
4 alleles, each 3 bases long, and the user is forced to notice they only differ in one base. c)  
5 The blue path is chosen as the reference, thus enabling a more succinct and natural  
6 representation of the SNP.

7 To output graph variation, we first select a path through the graph to be the reference  
8 sequence and describe any variation within the graph with respect to this path as shown in  
9 Figure 3. We use the chromosome field to detail the local graph within the PanRG in which a  
10 variant lies, and the position field to give the position in the chosen reference path sequence  
11 for that graph. In addition, we output the reference path sequences used as a separate file.

12 For a collection of samples, we want small differences between samples to be recorded as  
13 short alleles in the VCF file rather than longer alleles with shared flanking sequence as  
14 shown in Figure 3b. We therefore choose the reference path for each local graph to be  
15 maximally close to the sample mosaic paths. To do this, we make a copy of the k-mer graph  
16 and increment the coverage along each sample mosaic path, producing a graph with higher  
17 weights on paths shared by more samples. We reuse the mosaic path-finding algorithm (see  
18 Methods) with a modified probability function defined such that the probability of a node is  
19 proportional to the number of samples covering it. This produces a dataset-dependent VCF  
20 reference able to succinctly describe segregating variation in the cohort of genomes under  
21 analysis.

## 22 Constructing a PanRG of *E. coli*

23 We chose to evaluate *pandora* on the recombining bacterial species, *E. coli*, whose  
24 pan-genome has been heavily studied(7,23–26). MSAs for gene clusters curated with  
25 PanX(27) from 350 RefSeq assemblies were downloaded from <http://pangenome.de> on 3rd  
26 May 2018. MSAs for intergenic region clusters based on 228 *E. coli* ST131 genome  
27 sequences were previously generated with Piggy(28) for their publication. Whilst this panel  
28 of intergenic sequences does not reflect the full diversity within *E. coli*, we included them as  
29 an initial starting point. This resulted in an *E. coli* PanRG containing local graphs for 23,054  
30 genes and 14,374 intergenic regions. *Pandora* took 24.4h in CPU time (2.3h in runtime with  
31 16 threads) and 12.6 GB of RAM to index the PanRG. As one would expect from the  
32 U-shaped gene frequency distribution, many of the genes were rare in the 578 (=350+228)

1 input genomes, and so 59%/44% of the genic/intergenic graphs were linear, with just a  
2 single allele.

### 3 Constructing an evaluation set of diverse genomes

4 We first demonstrate that using a PanRG reduces hard bias when comparing a diverse set  
5 of 20 *E. coli* samples by comparison with standard single reference variant callers. We  
6 selected samples from across the phylogeny (including phylogroups A, B2, D and F(29))  
7 where we were able to obtain both long and short read sequence data from the same  
8 isolate.

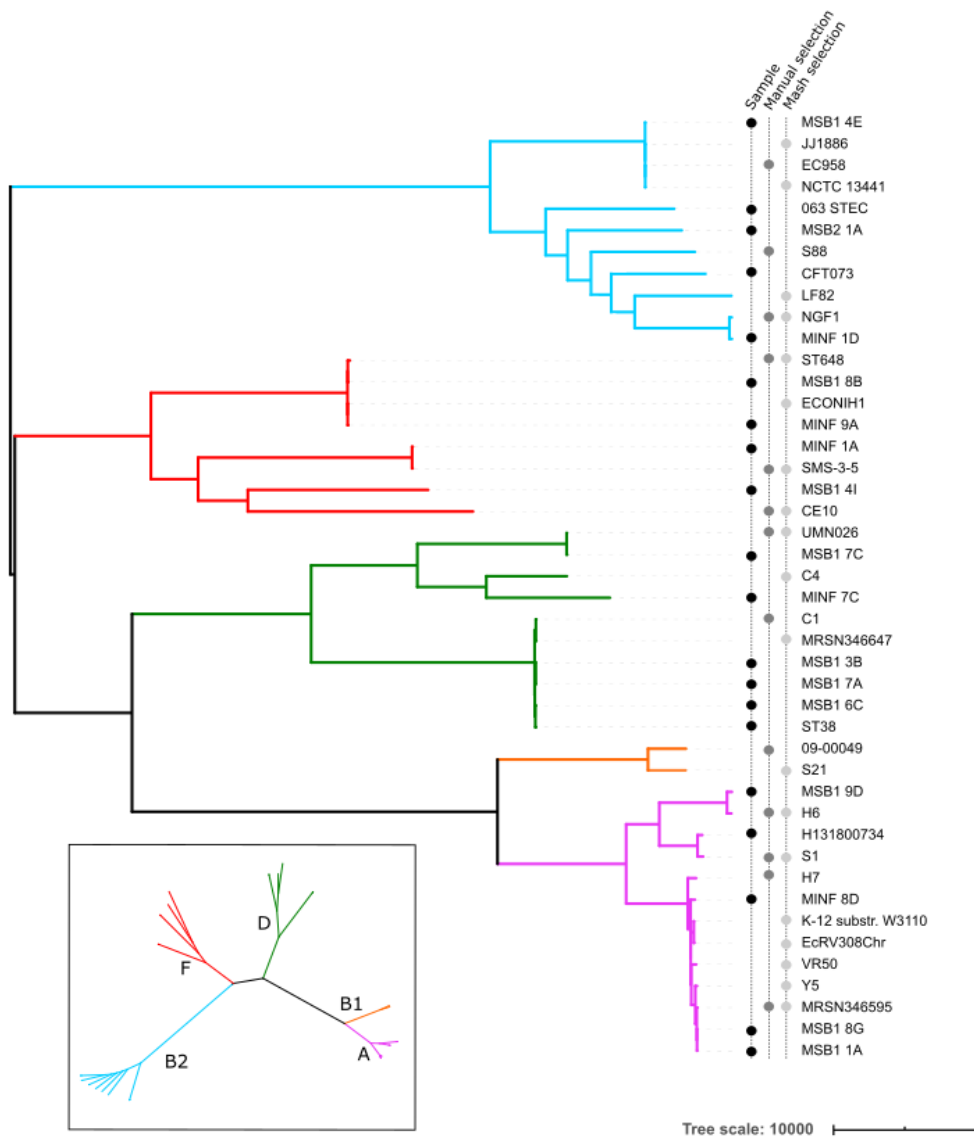

9 **Figure 4. Phylogeny of 20 diverse *E. coli* along with references used for benchmarking**  
10 **single-reference variant callers.** *The 20 E. coli under study are labelled as samples in the*  
11 *left-hand of three vertical label-lines. Phylogroups (clades) are labelled by colour of branch,*  
12 *with the key in the inset. References were selected from RefSeq as being the closest to one*  
13 *of the 20 samples as measured by Mash, or manually selected from a tree (see Methods).*



1 *Two assemblies from phylogroup B1 are in the set of references, despite there being no*  
2 *sample in that phylogroup.*

3 We used Illumina-polished long read assemblies as truth data, masking positions where the  
4 Illumina data did not support the assembly (see Methods). As comparators, we used  
5 SAMtools(30) (the “classical” variant-caller based on pileups) and Freebayes(31) (a  
6 haplotype-based caller which reduces soft reference bias, wrapped by Snippy(32)) for  
7 Illumina data, and Medaka(33) and Nanopolish(34) for Nanopore data. In all cases, we ran  
8 the reference-based callers with 24 carefully selected reference genomes (see Methods, and  
9 Figure 4). We defined a “truth set” of 618,305 segregating variants by performing all pairwise  
10 whole genome alignments of the 20 truth assemblies, collecting SNP variants between the  
11 pairs, and deduplicating them by clustering into equivalence classes. Each class, or  
12 *pan-variant*, represents the same variant found at different coordinates in different genomes  
13 (see Methods). We evaluated error rate, pan-variant recall (PVR, proportion of truth set  
14 discovered) and average allelic recall (AvgAR, average of the proportion of alleles of each  
15 pan-variant that are found). To clarify the definitions, consider a toy example. Suppose we  
16 have three genes, each with one SNP between them. The first gene is rare, present in 2/20  
17 genomes. The second gene is at an intermediate frequency, in 10/20 genomes. The third is  
18 a strict core gene, present in all genomes. The SNP in the first gene has alleles A,C at 50%  
19 frequency (1 A and 1 C). The SNP in the second gene has alleles G,T at 50% frequency (5  
20 G and 5 T). The SNP in the third gene has alleles A,T with 15 A and 5 T. Suppose a variant  
21 caller found the SNP in the first gene, detecting the two correct alleles. For the second  
22 gene’s SNP, it detected only one G and one T, failing to detect either allele in the other 8  
23 genomes. For the third gene’s SNP, it detected all the 5 T’s, but no A. Here, the pan-variant  
24 recall would be:  $(1 + 1 + 0) / 3 = 0.66$  - *i.e.* score a 1 if both alleles are found, irrespective of  
25 how often- and the average allelic recall would be  $(2/2 + 2/10 + 5/20)/3=0.48$ .

## 26 Methylation-aware basecalling improves results

27 In Figure 5, we show for 4 samples the effect of methylation-aware Nanopore basecalling on  
28 the AvgAR/error rate curve for *pandora* with/without novel variant discovery via local  
29 assembly.

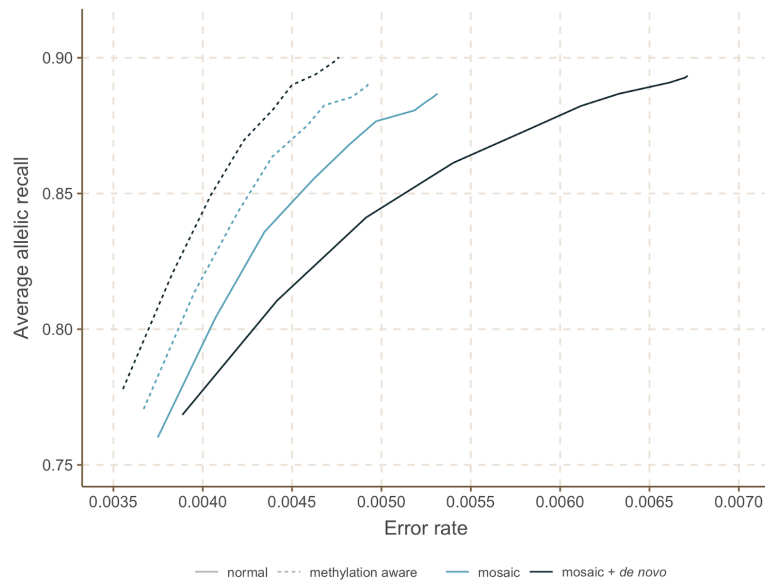

1 **Figure 5. The effect of methylation-aware basecalling on local *de novo* assembly.** We  
2 show the Average Allelic Recall and Error Rate curve for *pandora* with normal (solid line) or  
3 methylation-aware (dashed line) Guppy basecalling on 4 out of the 20 samples. For each of  
4 these input data, we show results for *Pandora*'s first approximation to a genome as a mosaic  
5 (recombinant) of the input reference panel (mosaic, light blue), and then the improved  
6 approximation with added *de novo* discovery (mosaic+*de novo*, dark blue).

7 The top right of each curve corresponds to completely unfiltered results; increasing the  
8 genotype confidence threshold (see Methods) moves each curve towards the bottom-left,  
9 increasing precision at the cost of recall. Notably, with normal basecalling, local *de novo*  
10 assembly increases the error rate from 0.53% to 0.67%, with a negligible increase in recall,  
11 from 88.7% to 89.3%, whereas with methylation-aware basecalling it increases the recall  
12 from 89.1% to 90% and slightly decreases the error rate from 0.49% to 0.48%. On the basis  
13 of this, from here on we work entirely with reads that are basecalled with a  
14 methylation-aware model, and move to the full dataset of 20 samples.

## 15 Benchmarking recall, error rate and dependence on reference

16 We show in Figures 6a,b the Illumina and Nanopore AvgAR/recall plots for *pandora* and four  
17 single-reference tools with no filters applied. For all of these, we modify only the minimum  
18 genotype confidence to move up and down the curves (see Methods).



1 are hard to interpret because *pandora* and the reference-based tools have recall that varies  
2 differently across the locus frequency spectrum - we explore this further below.

3 We ascribe the similarity between the Nanopore and Illumina performance of *pandora* to  
4 three reasons. First, the PanRG is a strong prior - our first approximation does not contain  
5 any Nanopore sequence, but simply uses quasi-mapped reads to find the nearest mosaic in  
6 the graph. Second, mapping long Nanopore reads which completely cover entire genes is  
7 easier than mapping Illumina data, and allows us to filter out erroneous k-mers within reads  
8 after deciding when a gene is present. Third, this performance is only achieved when we use  
9 methylation-aware basecalling of Nanopore reads, presumably removing most systematic  
10 bias (see Figure 5).

11 In Figure 6c,d we show for Illumina and Nanopore data, the impact of reference choice on  
12 the precision of calls on each of the 20 samples. While precision is consistent across all  
13 samples for *pandora*, we see a dramatic effect of reference-choice on precision of *SAMtools*,  
14 *medaka* and *nanopolish*. The effect is also detectable for *snippy*, but to a much lesser  
15 extent.

16 Finally, we measured the performance of locus presence detection, restricting to  
17 genes/intergenic regions in the PanRG, so that in principle perfect recall would be possible  
18 (see Methods). In Supplementary Figure 3 we show the distribution of locus presence calls  
19 by *pandora*, split by length of locus for Illumina and Nanopore data. Overall, 93.8%/94.3% of  
20 loci were correctly classified as present or absent for Illumina/Nanopore respectively.  
21 Misclassifications were concentrated on small loci (below 500bp). While 59.2%/57.4% of all  
22 loci in the PanRG are small, 75.5%/74.8% of false positive calls and 98.7%/98.1% of false  
23 negative calls are small loci (see Supplementary Figure 3).

## 24 *Pandora* detects rare variation inaccessible to single-reference methods

25 Next, we evaluate the key deliverable of *pandora* - the ability to access genetic variation  
26 within the accessory genome. We plot this in Figure 7, showing PVR of SNPs in the truth set  
27 which overlap genes or intergenic regions from the PanRG, broken down by the number of  
28 samples the locus is present in.

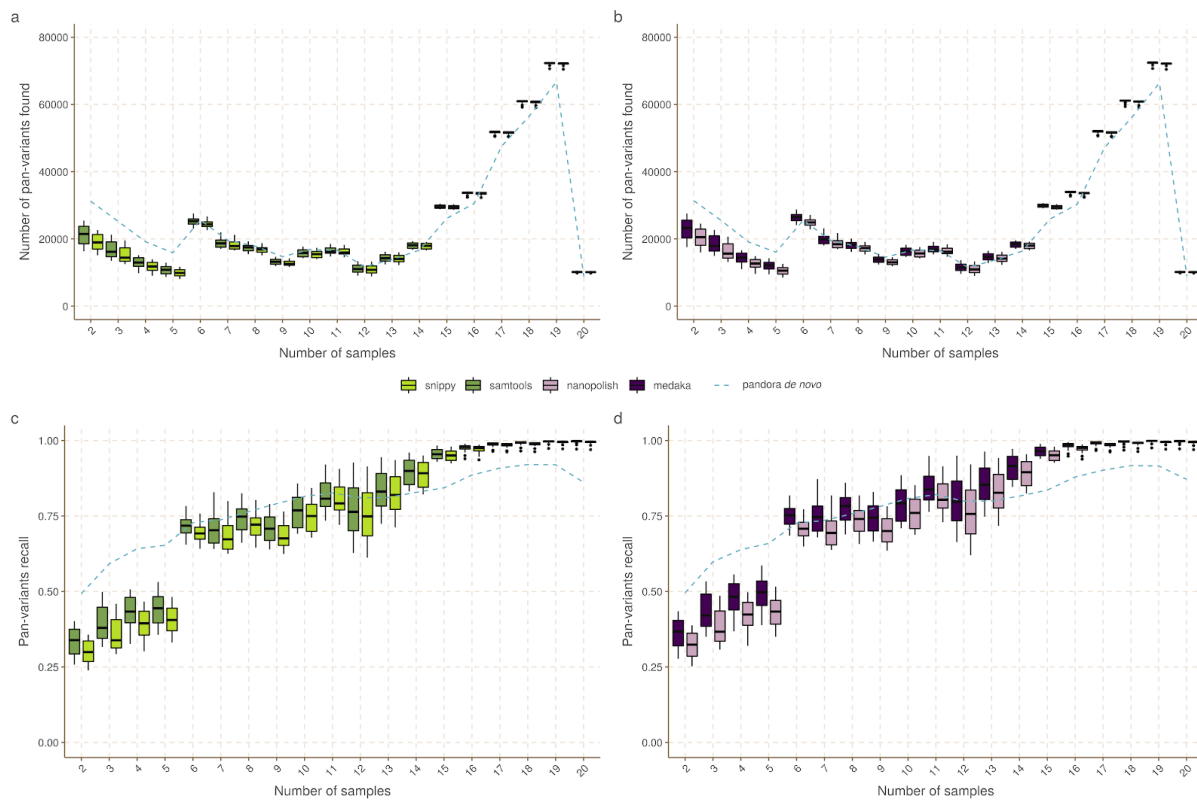

1 **Figure 7. Pan-variant recall across the locus frequency spectrum.** Every SNP occurs in  
2 a locus, which is present in some subset of the full set of 20 genomes. In all panels the  
3 SNPs in the golden truth set are broken down by the number of samples the locus is present  
4 in. Left panels (a, c) show results for pandora (dotted line), snippy and SAMtools with  
5 Illumina data. Right panels (b, d) show results for pandora, nanopolish and medaka with  
6 Nanopore data. Top panels (a, b) show the absolute count of pan-variants found; Bottom  
7 panels (c, d) show the proportion of pan-variants found.

8 If we restrict our attention to rare variants (present only in 2-5 genomes), we find *pandora*  
9 recovers at least 19644/26674/13108/22331 more SNPs than  
10 *SAMtools/snippy/medaka/nanopolish* respectively. As a proportion of rare SNPs in the truth  
11 set, this is a lift in PVR of 12/17/8/14% respectively. If, instead of pan-variant recall, we look  
12 at the variation of AvgAR across the locus frequency spectrum (see Supplementary Figure  
13 4), the gap between *pandora* and the other tools on rare loci is even larger. These  
14 observations, and Figure 6, confirm and quantify the extent to which we are able to recover  
15 accessory genetic variation that is inaccessible to single-reference based methods.

## 16 *Pandora* has consistent results across *E. coli* phylogroups

17 We measure the impact of reference bias (and population structure) by quantifying how  
18 recall varies in phylogroups A, B2, D, and F dependent on whether the reference genome  
19 comes from the same phylogroup.

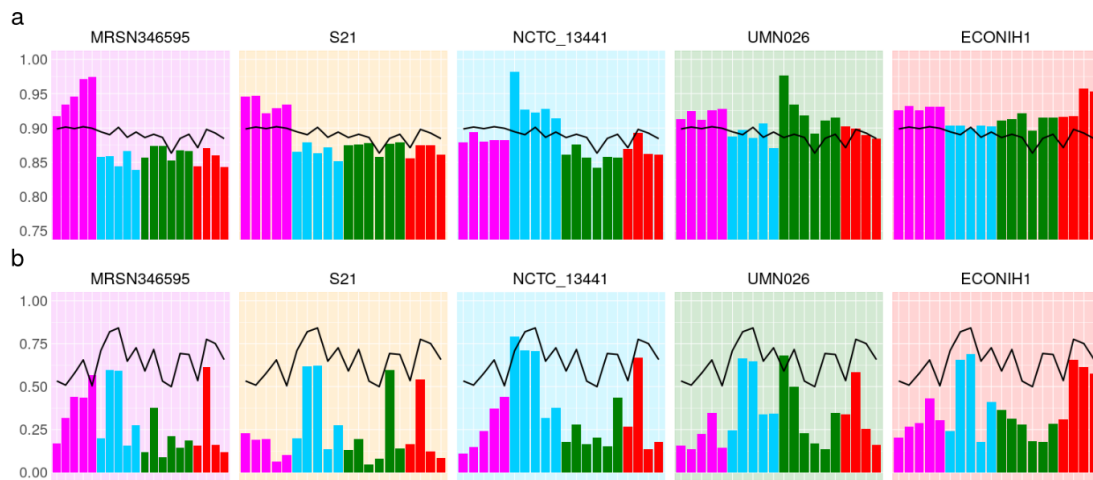

1 **Figure 8. Single reference callers achieve higher recall for samples in the same**  
2 **phylogroup as the reference genome, but not for rare loci. a) *pandora* recall (black line)**  
3 **and *snippy* recall (coloured bars) on the 20 samples; each histogram corresponds to the use**  
4 **of one of 5 exemplar references, one from each phylogroup. The background colour denotes**  
5 **the reference's phylogroup (see Figure 4 inset); note that phylogroup B1 (yellow**  
6 **background) is an outgroup, containing no samples in this dataset; b) Same as a) but**  
7 **restricted to SNPs present in precisely two samples (i.e. where 18 samples have neither**  
8 **allele because the entire locus is missing). Note the differing y-axis limits in the two panels.**

9 We plot the results for *snippy* with 5 exemplar references in Figure 8a (results for all tools  
10 and for all references are in Supplementary Figures 5-8), showing that single references give  
11 5-10% higher recall for samples in their own phylogroup than other phylogroups. By  
12 comparison, *pandora*'s recall is much more consistent, staying stable at ~89% for all  
13 samples regardless of phylogroup. References in phylogroups A and B2 achieve higher  
14 recall in their own phylogroup, but consistently worse than *pandora* for samples in the other  
15 phylogroups (in which the reference does not lie). References in the external phylogroup B1,  
16 for which we had no samples in our dataset, achieve higher recall for samples in the nearby  
17 phylogroup A (see inset, Figure 4), but lower than *pandora* for all others. We also see that  
18 choosing a reference genome from phylogroup F (red), which sits intermediate to the other  
19 phylogroups, provides the most uniform recall across other groups - 2-5% higher than  
20 *pandora*.



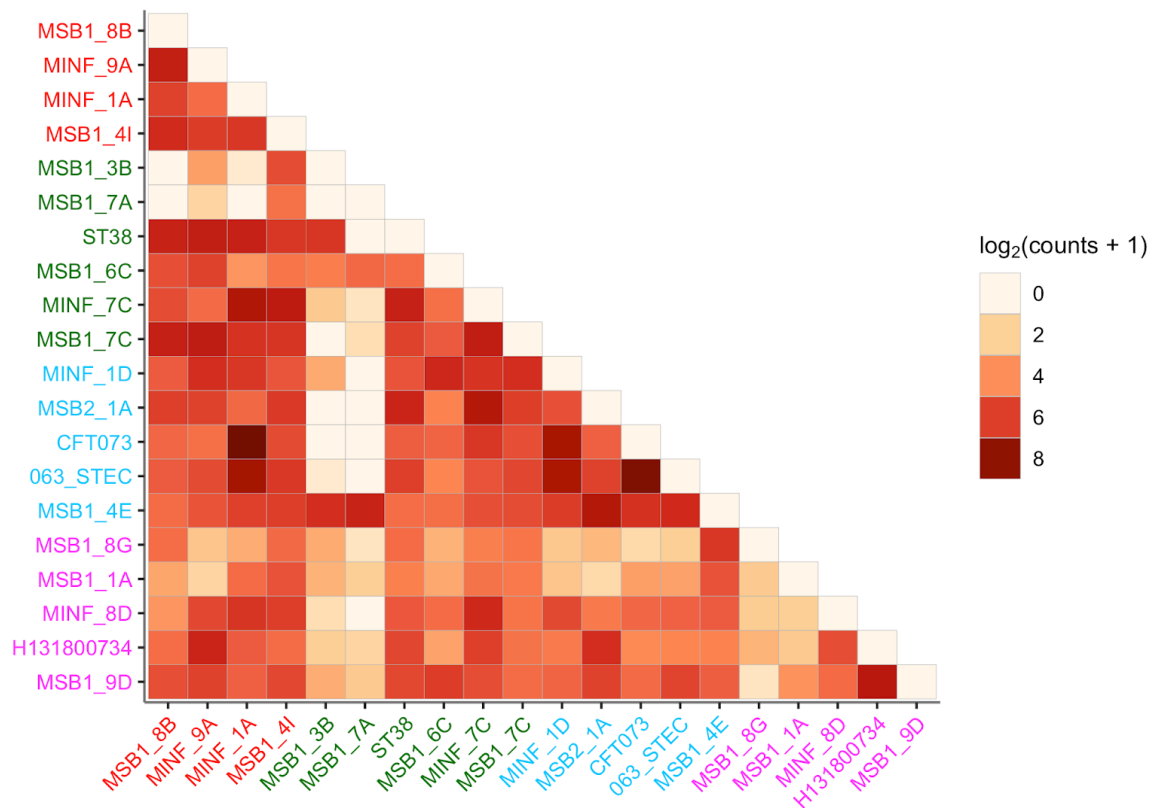

1 **Figure 9. Sharing of variants present in precisely 2 genomes, showing which pairs of**  
2 **genomes they lie in and which phylogroups; darker colours signify higher counts (log**  
3 **scale). Genomes are coloured by their phylogroup (see Figure 4 inset).**

4 These results will, however, be dominated by the shared, core genome. If we replot Figure  
5 8a, restricting to variants in loci present in precisely 2 genomes (abbreviated to 2-variants;  
6 Figure 8b), we find that *pandora* achieves 50-84% recall for each sample (complete data in  
7 Supplementary Figure 9). By contrast, for any choice of reference genome, the results for  
8 single-reference callers vary dramatically per sample. Most samples have recall under 25%,  
9 and there is no pattern of improved recall for samples in the same phylogroup as the  
10 reference. Following up that last observation, if we look at which pairs of genomes share  
11 2-variants (Figure 9), we find there is no enrichment within phylogroups at all. This simply  
12 confirms in our data that presence of rare loci is not correlated with the overall phylogeny.

### 13 *Pandora* VCF reference is closer to samples than any single reference

14 The relationship between phylogenetic distance and gene repertoire similarity is not linear. In  
15 fact, 2 genomes in different phylogroups may have more similar accessory genes than 2 in  
16 the same phylogroup - as illustrated in the previous section (also see Figure 3 in Rocha(3)).  
17 As a result, it is unclear *a priori* how to choose a good reference genome for comparison of  
18 accessory loci between samples. *Pandora* specifically aims to construct an appropriate  
19 reference for maximum clarity in VCF representation. We evaluate how well *pandora* is able

- 1 to find a VCF reference close to the samples under study as follows. We first identified the
- 2 location of all loci in all the 20 sample assemblies and the 24 references (see Methods).

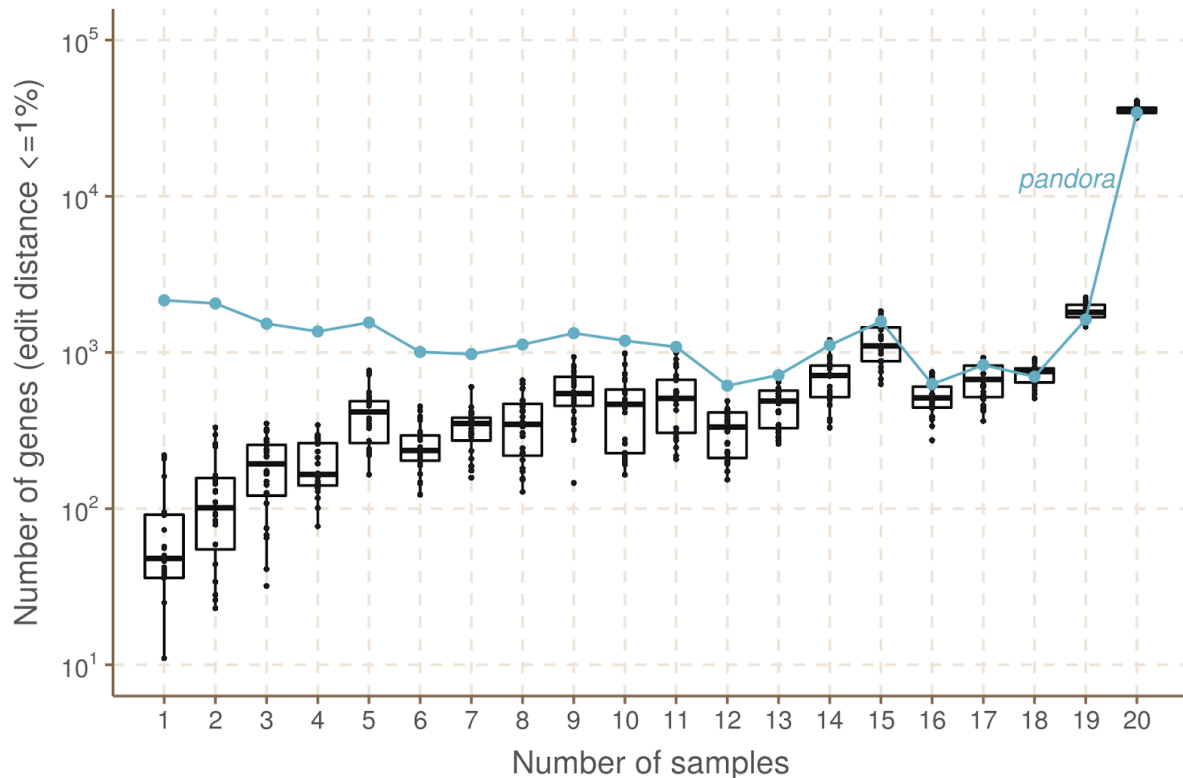

- 3 **Figure 10. How often do references closely approximate a sample?** *pandora* aims to
- 4 infer a reference for use in its VCF, which is as close as possible to all samples. We evaluate
- 5 the success of this here. The x-axis shows the number of genomes in which a locus occurs.
- 6 The y-axis shows the (log-scaled) count of loci in the 20 samples that are within 1% edit
- 7 distance (scaled by locus length) of each reference - box plots for the reference genomes,
- 8 and line plot for the VCF reference inferred by *pandora*.

9 We then measured the edit distance between each locus in each of the references and the  
10 corresponding version in the 20 samples. We found that the *pandora*'s VCF-reference lies  
11 within 1% edit distance (scaled by locus length) of the sample far more than any of the  
12 references for loci present in  $\leq 14$  samples (Figure 10; note the log scale). The  
13 improvement is much reduced in the core genome; essentially, in the core, a  
14 phylogenetically close reference provides a good approximation, but it is hard to choose a  
15 single reference that provides a close approximation to all rare loci. By contrast, *pandora* is  
16 able to leverage its reference panel, and the dataset under study, to find a good  
17 approximation.

## 1 Computational performance

2 Performance measurements for single-sample analysis by *pandora* and benchmarked tools  
3 are shown in Supplementary Table 3. In short, *pandora* took 3-4 hours per sample (using 16  
4 cores and up to 10.7 GB of RAM), which was slower than *snippy* (0.1h, 4 cores), *SAMtools*  
5 (0.3h, 1 core) and *medaka* (0.3h, 4 cores), but faster than *nanopolish* (4.6h, 16 cores).

6 *Pandora* alone can do joint analysis of multiple samples and this is currently the most  
7 expensive *pandora* step. Parallelising by gene on a compute cluster, it took 8 hours to  
8 augment the PanRG with novel alleles. This was dominated by the Python implementation of  
9 the RCC clustering algorithm (see Methods) and the use of Clustal Omega(35) for MSA.  
10 90% of loci required less than 30 minutes to process, and the remainder took less than 2  
11 hours (see Methods). We discuss below how this could be improved. Finally, it took 28/46  
12 hours to compare the samples (produce the joint VCF file) for Illumina/Nanopore. Mapping  
13 comprised ~10% of the Illumina time, and ~50% of the Nanopore time. Dynamic  
14 programming and genotyping the VCF file took ~90% of the Illumina time, and ~50% of the  
15 Nanopore time.

## 16 Discussion

17 Bacteria are the most diverse and abundant cellular life form(36). Some species are  
18 exquisitely tuned to a particular niche (e.g. obligate pathogens of a single host) while others  
19 are able to live in a wide range of environments (e.g. *E. coli* can live on plants, in the earth,  
20 or commensally in the gut of various hosts). Broadly speaking, a wider range of  
21 environments correlates with a larger pan-genome, and some parts of the gene repertoire  
22 are associated with specific niches(37). Our perception of a pan-genome therefore depends  
23 on our sampling of the unknown underlying population structure, and similarly the  
24 effectiveness of a PanRG will depend on the choice of reference panel from which it is built.

25 Many examples from different species have shown that bacteria are able to leverage this  
26 genomic flexibility, adapting to circumstance sometimes by using or losing novel genes  
27 acquired horizontally, and at other times by mutation. There are many situations where  
28 precise nucleotide-level variants matter in interpreting pan-genomes. Some examples  
29 include: compensatory mutations in the chromosome reducing the fitness burden of new  
30 plasmids(38–40); lineage-specific accessory genes with SNP mutations which distinguish  
31 carriage from infection(41); SNPs within accessory drug resistance genes leading to  
32 significant differences in antibiograms(42); and changes in CRISPR spacer arrays showing  
33 immediate response to infection(43,44). However, up until now there has been no automated  
34 way of studying non-core gene SNPs at all; still less a way of integrating them with gene  
35 presence/absence information. *Pandora* solves these problems, allowing detection and  
36 genotyping of core and accessory variants. It also addresses the problem of what reference  
37 to use as a coordinate system, inferring a mosaic “VCF reference” which is as close as  
38 possible to all samples under study. We find this gives more consistent SNP-calling than any  
39 single reference in our diverse dataset. We focussed primarily on Nanopore data when  
40 designing *pandora*, and show it is possible to achieve higher quality SNP calling with this

1 data than with current Nanopore tools. Together, these results open the door for empirical  
2 studies of the accessory genome, and for new population genetic models of the pan-genome  
3 from the perspective of both SNPs and gene gain/loss.

4 Prior graph genome work, focussing on soft reference bias (in humans), has evaluated  
5 different approaches for selecting alleles for addition to a population graph, based on  
6 frequency, avoiding creating new repeats, and avoiding exponential blowup of haplotypes in  
7 clusters of variants(45). This approach makes sense when you have unphased diploid VCF  
8 files and are considering all recombinants of clustered SNPs as possible. However, this is  
9 effectively saying we consider the recombination rate to be high enough that all  
10 recombinants are possible. Our approach, building from local MSAs and only collapsing  
11 haplotypes when they agree for a fixed number of bases, preserves more haplotype  
12 structure and avoids combinatorial explosion. Another alternative approach was recently  
13 taken by Norri *et al.*(46), inferring a set of pseudo founder genomes from which to build the  
14 graph.

15 Another issue is how to select the reference panel of genomes in order to minimize hard  
16 reference bias. One cannot escape the U-shaped frequency distribution; whatever reference  
17 panel is chosen, future genomes under study will contain rare genes not present in the  
18 PanRG. Given the known strong population structure in bacteria, and the association of  
19 accessory repertoires with lifestyle and environment, we would advocate sampling by  
20 geography, host species (if appropriate), lifestyle (e.g. pathogenic versus commensal) and/or  
21 environment. In this study we built our PanRG from a biased dataset (RefSeq) which does  
22 not attempt to achieve balance across phylogeny or ecology, limiting our pan-variant recall to  
23 49% for rare variants (see Figure 7c,d). A larger, carefully curated input panel, such as that  
24 from Horesh *et al.*(47), would provide a better foundation and potentially improve results.

25 A natural question is then to ask if the PanRG should continually grow, absorbing all variants  
26 ever encountered. From our perspective, the answer is no - a PanRG with variants at all  
27 non-lethal positions would be potentially intractable. The goal is not to have every possible  
28 allele in the PanRG - no more than a dictionary is required to contain absolutely every word  
29 that has ever been said in a language. As with dictionaries, there is a trade-off between  
30 completeness and utility, and in the case of bacteria, the language is far richer than English.  
31 The perfect PanRG contains the vast majority of the genes and intergenic regions you are  
32 likely to meet, and just enough breadth of allelic diversity to ensure reads map without too  
33 many mismatches. Missing alleles should be discoverable by local assembly and added to  
34 the graph, allowing multi-sample comparison of the cohort under study. This allows one to  
35 keep the main PanRG lightweight enough for rapid and easy use.

36 We finish with three potential applications of *pandora*. First, the PanRG should provide a  
37 more interpretable substrate for pan-genome-wide Genome-Wide Association Studies, as  
38 current methods are forced to either ignore the accessory genome or reduce it to k-mers or  
39 unitigs(48–50). Second, if performing prospective surveillance of microbial isolates taken in a  
40 hospital, the PanRG provides a consistent and unchanging reference, which will cope with  
41 the diversity of strains seen without requiring the user to keep switching reference genome.

1 In a sense it behaves similarly to whole-genome Multi-Locus Sequence Typing  
2 (wgMLST)(51), with more flexibility, support for intergenic regions, and without the  
3 all-or-nothing behaviour when alleles have a novel SNP. Third, if studying a fixed dataset  
4 very carefully, then one may not want to use a population PanRG, as it necessarily will miss  
5 some rare accessory genes in the dataset. In these circumstances, one could construct a  
6 reference graph purely of the genes/intergenic regions present in this dataset.

7 There are a number of limitations to this study. Firstly, *pandora* is not yet a fully-fledged  
8 production tool. There are two steps that constitute bottlenecks in terms of RAM and speed.  
9 The RCC algorithm used for local graph construction is currently implemented in Python.  
10 However, the underlying algorithm is amenable to a much higher performance  
11 implementation, which is now in progress. Also, we use Clustal Omega(35) for the MSA  
12 stage, and there are faster options which we could use, including options for augmenting an  
13 MSA without a complete rebuild (e.g. MAFFT), which is exactly what we need after local  
14 assembly discovers novel alleles. Secondly, we do not see any fundamental reason why the  
15 *pandora* error rate should be worse than Snippy on Illumina data (see Figure 6C), and will be  
16 working to improve this. Finally, by working in terms of atomic loci instead of a monolithic  
17 genome-wide graph, *pandora* opens up graph-based approaches to structurally diverse  
18 species (and eases parallelisation) but at the cost of losing genome-wide ordering. At  
19 present, ordering can be resolved by (manually) mapping *pandora*-discovered genes onto  
20 whole genome assemblies. However the design of *pandora* also allows for gene-ordering  
21 inference: when Nanopore reads cover multiple genes, the linkage between them is stored in  
22 a secondary de Bruijn graph where the alphabet consists of gene identifiers. This results in a  
23 huge alphabet, but the k-mers are almost always unique, dramatically simplifying “assembly”  
24 compared with normal DNA de Bruijn graphs. This work is still in progress and the subject of  
25 a future study. In the meantime, *pandora* provides new ways to access previously hidden  
26 variation.

## 27 Conclusions

28 The algorithms implemented in *pandora* provide, to our knowledge, the first solution to the  
29 problem of analysing core and accessory genetic variation across a set of bacterial  
30 genomes. This study demonstrates as good SNP genotype error rates with Nanopore as  
31 with Illumina data and improved recall of accessory variants. It also shows the benefit of an  
32 inferred VCF reference genome over simply picking from RefSeq. The main limitations were  
33 the use of a biased reference panel (RefSeq) for building the PanRG, and the  
34 comparatively slow performance of one module, currently implemented in Python - both of  
35 which are addressable, not fundamental limitations. This opens the door to improved  
36 analyses of many existing and future bacterial genomic datasets.

## 1 Methods

### 2 Local graph construction

3 We construct each local graph in the PanRG from an MSA using an iterative partitioning  
4 process. The resulting sequence graph contains nested bubbles representing alternative  
5 alleles.

6 Let  $A$  be an MSA of length  $n$ . For each row of the MSA  $a = \{a_0, \dots, a_{n-1}\} \in A$  let  
7  $a_{i:j} = \{a_i, \dots, a_{j-1}\}$  be the subsequence of  $a$  in interval  $[i, j)$ . Let  $s(a)$  be the DNA sequence  
8 obtained by removing all non-AGCT symbols. We can partition alignment  $A$  either *vertically*  
9 by partitioning the interval  $[0, n)$  or *horizontally* by partitioning the set of rows of  $A$ . In both  
10 cases, the partition induces a number of sub-alignments.

11 For vertical partitions, we define  $slice_A(i, j) = \{a_{i:j} : a \in A\}$ . We say that interval  $[i, j)$  is a  
12 *match* interval if  $j - i \geq m$ , where  $m = 7$  is the default minimum match length, and there is a  
13 single non-trivial sequence in the slice, i.e.  $|\{s(a) : a \in slice_A(i, j) \text{ and } s(a) \neq ""\}| = 1$ .  
14 Otherwise, we call it a *non-match* interval.

15 For horizontal partitions, we use  $K$ -means clustering(52) to divide sequences into increasing  
16 numbers of clusters  $K = 2, 3, \dots$  until the *inertia*, a measure of the within-cluster diversity, is  
17 half that of the original full set of sequences. More formally, let  $U$  be the set of all  $m$ -mers  
18 (substrings of length  $m$ , the minimum match length) in  $\{s(a) : a \in A\}$ . For  $a \in A$  we  
19 transform sequence  $s(a)$  into a count vector  $\bar{x}_a = \{x_a^1, \dots, x_a^{|U|}\}$  where  $x_a^i$  are the counts of  
20 the unique  $m$ -mers in  $U$ . For  $K$  clusters  $\bar{C} = \{C_1, \dots, C_K\}$ , the inertia is defined as

$$21 \quad arg \min_C \sum_{j=1}^K \sum_{\bar{x}_a \in C_j} |\bar{x}_a - \mu_j|^2$$

22 where  $\mu_j = \frac{1}{|C_j|} \sum_{\bar{x}_a \in C_j} \bar{x}_a$  is the mean of cluster  $j$ .

23 The recursive algorithm first partitions an MSA vertically into match and non-match intervals.  
24 Match intervals are *collapsed* down to the single sequence they represent. Independently for  
25 each non-match interval, the alignment slice is partitioned horizontally into clusters. The  
26 same process is then applied to each induced sub-alignment until a maximum number of  
27 recursion levels,  $r = 5$ , has been reached. For any remaining alignments, a node is added to  
28 the local graph for each unique sequence. See Supplementary Animation 1 to see an  
29 example of this algorithm. We name this algorithm Recursive Cluster and Collapse (RCC),  
30 and implement in the `make_prg` repository (see Code Availability).

### 31 (w,k)-minimizers of graphs

32 We define (w,k)-minimizers of strings as in Li (2016) (53). Let  $\phi : \Sigma^k \rightarrow \mathfrak{R}$  be a k-mer hash  
33 function and let  $\pi : \Sigma^* \times \{0, 1\} \rightarrow \Sigma^*$  be defined such that  $\pi(s, 0) = s$  and  $\pi(s, 1) = \bar{s}$ , where  $\bar{s}$   
34 is the reverse complement of  $s$ . Consider any integers  $k \geq w > 0$ . For window start position  
35  $0 \leq j \leq |s| - w - k + 1$ , let



$$1 \quad T_j = \{\pi(s_{p,p+k}, r) : j \leq p < j + w, r \in \{0, 1\}\}$$

2 be the set of forward and reverse-complement k-mers of  $s$  in this window. We define a  
3 (w,k)-minimizer to be any triple  $(h, p, r)$  such that

$$4 \quad h = \phi(\pi(s_{p,p+k}, r)) = \min\{\phi(t) : t \in T_j\}.$$

5 The set  $W(s)$  of (w,k)-minimizers for  $s$ , is the union of minimizers over such windows.

$$6 \quad W(s) = \bigcup_{0 \leq j \leq |s| - w - k + 1} \{(h, p, r) : h = \min\{\phi(t) : t \in T_j\}\}.$$

7 We extend this definition intuitively to an acyclic sequence graph  $G = (V, E)$ . Define  $|v|$  to be  
8 the length of the sequence associated with node  $v \in V$  and let  $i = (v, a, b)$ ,  $0 \leq a \leq b \leq |v|$   
9 represent the sequence interval  $[a, b)$  on  $v$ . We define a *path* in  $G$  by

$$10 \quad \bar{p} = \{(i_1, \dots, i_m) : (v_j, v_{j+1}) \in E \text{ and } b_j \equiv |v_j|, \text{ for } 1 \leq j < m\}.$$

11 This matches the intuitive definition for a path in a sequence graph except that we allow the  
12 path to overlap only part of the sequence associated with the first and last nodes. We will  
13 use  $s_{\bar{p}}$  to refer to the sequence along the path  $\bar{p}$  in the graph.

14 Let  $\bar{p}$  be a path of length  $w+k-1$  in  $G$ . The string  $s_{\bar{p}}$  contains  $w$  consecutive k-mers for which  
15 we can find the (w,k)-minimizer(s) as before. We therefore define the (w,k)-minimizer(s) of  
16 the graph  $G$  to be the union of minimizers over all paths of length  $w+k-1$  in  $G$ :

$$17 \quad W(G) = \bigcup_{\bar{p} \in G : |\bar{p}| = w+k-1} \{(h, \bar{p}, r) : h = \min\{\phi(t) : t \in T_{\bar{p}}\}\}.$$

## 18 Local graph indexing with (w,k)-minimizers

19 To find minimizers for a graph we use a streaming algorithm as described in Supplementary  
20 Algorithm 1. For each minimizer found, it simply finds the next minimizer(s) until the end of  
21 the graph has been reached.

22 Let  $walk(v, i, w, k)$  be a function which returns all vectors of  $w$  consecutive k-mers in  $G$   
23 starting at position  $i$  on node  $v$ . Suppose we have a vector of k-mers  $x$ . Let  $shift(x)$  be the  
24 function which returns all possible vectors of k-mers which extend  $x$  by one k-mer. It does  
25 this by considering possible ways to walk one letter in  $G$  from the end of the final k-mer of  $x$ .  
26 For a vector of k-mers of length  $w$ , the function  $minimize(x)$  returns the minimizing k-mers of  
27  $x$ .

28 We define  $K$  to be a *k-mer graph* with nodes corresponding to minimizers  $(h, \bar{p}, r)$ . We add  
29 edge  $(u, v)$  to  $K$  if there exists a path in  $G$  for which  $u$  and  $v$  are both minimizers and  $v$  is the  
30 first minimizer after  $u$  along the path. Let  $K \leftarrow add(s, t)$  denote the addition of nodes  $s$  and  $t$  to  
31  $K$  and the directed edge  $(s, t)$ . Let  $K \leftarrow add(s, T)$  denote the addition of nodes  $s$  and  $t \in T$  to  
32  $K$  as well as directed edges  $(s, t)$  for  $t \in T$ , and define  $K \leftarrow add(S, t)$  similarly.

33 The resulting PanRG index stores a map from each minimizing k-mer hash value to the  
34 positions in all local graphs where that (w,k)-minimizer occurred. In addition, we store the  
35 induced k-mer graph for each local graph.

## 1 Quasi-mapping reads

2 We infer the presence of PanRG loci in reads by quasi-mapping. For each read, a sketch of  
3 (w,k)-minimizers is made, and these are queried in the index. For every (w,k)-minimizer  
4 shared between the read and a local graph in the PanRG index, we define a *hit* to be the  
5 coordinates of the minimizer in the read and local graph and whether it was found in the  
6 same or reverse orientation. We define clusters of hits from the same read, local graph and  
7 orientation if consecutive read coordinates are within a certain distance. If this cluster is of  
8 sufficient size, the locus is deemed to be present and we keep the hits for further analysis.  
9 Otherwise, they are discarded as noise. The default for this “sufficient size” is at least 10 hits  
10 and at least 1/5th the length of the shortest path through the k-mer graph (Nanopore) or the  
11 number of k-mers in a read sketch (Illumina). Note that there is no requirement for all these  
12 hits to lie on a single path through the local graph. A further filtering step is therefore applied  
13 after the sequence at a locus is inferred to remove false positive loci, as indicated by low  
14 mean or median coverage along the inferred sequence by comparison with the global  
15 average coverage. This quasi-mapping procedure is described in pseudocode in  
16 Supplementary Algorithm 2.

## 17 Initial sequence approximation as a mosaic of references

18 For each locus identified as present in the set of reads, quasi-mapping provides (filtered)  
19 coverage information for nodes of the directed acyclic k-mer graph. We use these to  
20 approximate the sequence as a mosaic of references as follows. We model k-mer coverage  
21 with a negative binomial distribution and use the simplifying assumption that k-mers are read  
22 independently. Let  $\Theta$  be the set of possible paths through the k-mer graph, which could  
23 correspond to the true genomic sequence from which reads were generated. Let  $r + s$  be the  
24 number of times the underlying DNA was read by the machine, generating a k-mer coverage  
25 of  $s$ , and  $r$  instances where the k-mer was sequenced with errors. Let  $1 - p$  be the probability  
26 that a given k-mer was sequenced correctly. For any path  $\theta \in \Theta$ , let  $\{X_1, \dots, X_M\}$  be  
27 independent and identically distributed random variables with probability distribution  
28  $f(x_i, r, p) = \frac{\Gamma(r+s)}{\Gamma(r)! \Gamma(s)!} p^r (1-p)^s$ , representing the k-mer coverages along this path. Since the mean  
29 and variance are  $\frac{(1-p)r}{p}$  and  $\frac{(1-p)r}{p^2}$  we solve for  $r$  and  $p$  using the observed k-mer coverage  
30 mean and variance across all k-mers in all graphs for the sample. Let  $D$  be the k-mer  
31 coverage data seen in the read dataset. We maximise the log-likelihood-inspired score  
32  $\hat{\theta} = \{arg \max_{\theta \in \Theta} l(\theta|D)\}$  where  $l(\theta|D) = \frac{1}{M} \sum_{i=1}^M \log f(s_i, r, p)$ , where  $s_i$  is the observed  
33 coverage of the  $i$ -th k-mer in  $\theta$ . By construction, the k-mer graph is directed and acyclic so  
34 this maximisation problem can be solved with a dynamic programming algorithm (for  
35 pseudocode, see Supplementary Algorithm 3).

- 1 For choices of  $w \leq k$  there is a unique sequence along the discovered path through the
- 2 k-mer graph (except in rare cases within the first or last  $w-1$  bases). We use this closest
- 3 mosaic of reference sequences as an initial approximation of the sample sequence.

#### 4 *De novo* variant discovery

- 5 The first step in our implementation of local *de novo* variant discovery in genome graphs is
- 6 finding the candidate regions of the graph that show evidence of dissimilarity from the
- 7 sample's reads.

#### 8 Finding candidate regions

- 9 The input required for finding candidate regions is a local graph,  $n$ , within the PanRG, the
- 10 maximum likelihood path of both sequence and k-mers in  $n$ ,  $lmp_n$  and  $kmp_n$  respectively, and
- 11 a padding size  $w$  for the number of positions surrounding the candidate region to retrieve.

12 We define a candidate region,  $r$ , as an interval within  $n$  where coverage on  $lmp_n$  is less than  
13 a given threshold,  $c$ , for more than  $l$  and less than  $m$  consecutive positions.  $m$  acts to restrict  
14 the size of variants we are able to detect. If set too large, the following steps become much  
15 slower due to the combinatorial expansion of possible paths.

16 For a given read,  $s$ , that has a mapping to  $r$  we define  $s_r$  to be the subsequence of  $s$  that  
17 maps to  $r$ , including an extra  $w$  positions either side of the mapping. We define the pileup  $P_r$   
18 as the set of all  $s_r \in r$ .

#### 19 Enumerating paths through candidate regions

20 For  $r \in R$ , where  $R$  is the set of all candidate regions, we construct a de Bruijn graph  $G_r$   
21 from the pileup  $P_r$  using the GATB library(54).  $A_L$  and  $A_R$  are defined as sets of k-mers to  
22 the left and right of  $r$  in the local graph. They are anchors to allow re-insertion of new  
23 sequences found by *de novo* discovery into the local graph. If we cannot find an anchor on  
24 both sides, then we abandon *de novo* discovery for  $r$ . We use sets of k-mers for  $A_L$  and  $A_R$ ,  
25 rather than a single anchor k-mer, to provide redundancy in the case where sequencing  
26 errors cause the absence of some k-mers in  $G_r$ . Once  $G_r$  is built, we define the start  
27 anchor k-mer,  $a_L$ , as the first  $a_L \in A_L \wedge a_L \in G_r$ . Likewise, we define the end  
28 anchor k-mer,  $a_R$ , as the first  $a_R \in A_R \wedge a_R \in G_r$ .

29  $T_r$  is the spanning tree obtained by performing depth-first search (DFS) on  $G_r$ , beginning  
30 from node  $a_L$ . We define  $p_r$  as a path, from the root node  $a_L$  of  $T_r$  and ending at node  $a_R$ ,  
31 which fulfils the two conditions: 1)  $p_r$  is shorter than the maximum allowed path length. 2)  
32 No more than  $k$  nodes along  $p_r$  have coverage  $< f \times e_r$ , where  $e_r$  is the expected k-mer

1 coverage for  $r$  and  $f$  is  $n_r \times s$ , where  $n_r$  is the number of iterations of path enumeration for  $r$   
2 and  $s$  is a step size (0.1 by default).

3  $V_r$  is the set of all  $p_r$ . If  $|V_r|$  is greater than a predefined threshold, then we have too many  
4 candidate paths, and we decide to filter more aggressively:  $f$  is incremented by  $s$  - effectively  
5 requiring more coverage for each  $p_r$  - and  $V_r$  is repopulated. If  $f > 1.0$  then *de novo*  
6 discovery is abandoned for  $r$ .

## 7 Pruning the path-space in a candidate region

8 As we operate on both accurate and error-prone sequencing reads, the number of valid  
9 paths in  $G_r$  can be very large. Primarily, this is due to cycles that can occur in  $G_r$  and  
10 exploring paths that will never reach our required end anchor  $a_R$ . In order to reduce the  
11 path-space within  $G_r$  we prune paths based on multiple criteria. Critically, this pruning  
12 happens at each step of the graph walk (path-building).

13 We used a distance-based optimisation based on Rizzi et al (55). In addition to  $T_r$ , obtained  
14 by performing DFS on  $G_r$ , we produce a distance map  $D_r$  that results from running  
15 reversed breadth-first search (BFS) on  $G_r$ , beginning from node  $a_R$ . We say reversed BFS  
16 as we explore the predecessors of each node, rather than the successors.  $D_r$  is  
17 implemented as a binary search tree where each node in the tree represents a k-mer in  $G_r$   
18 that is reachable from  $a_R$  via reversed BFS. Each node additionally has an integer attached  
19 to it that describes the distance from that node to  $a_R$ .

20 We can use  $D_r$  to prune the path-space by 1) for each node  $n \in p_r$ , we require  $n \in D_r$  and  
21 2) requiring  $a_R$  be reached from  $n$  in, at most,  $i$  nodes, where  $i$  is defined as the maximum  
22 allowed path length minus the number of nodes walked to reach  $n$ .

23 If one of these conditions is not met, we abandon  $p_r$ . The advantage of this pruning process  
24 is that we never explore paths that will not reach our required endpoint within the maximum  
25 allowed path length and when caught in a cycle, we abandon the path once we have made  
26 too many iterations around the cycle.

## 27 Graph-based genotyping and optimal reference construction for 28 multi-genome comparison

29 We use graph-based genotyping to output a comparison of samples in a VCF. A path  
30 through the graph is selected to be the reference sequence, and graph variation is described  
31 with respect to this reference. The chromosome field then details the local graph and the  
32 position field gives the position within the chosen reference sequence for possible variant  
33 alleles. The reference path for each local graph is chosen to be maximally close to the set of  
34 sample mosaic paths. This is achieved by reusing the mosaic path finding algorithm detailed  
35 in Supplementary Algorithm 3 on a copy of the k-mer graph with coverages incremented  
36 along each sample mosaic path, and a modified probability function defined such that the  
37 probability of a node is proportional to the number of samples covering it. This results in an  
38 optimal path, which is used as the VCF reference for the multi-sample VCF file.

1 For each sample and site in the VCF file, the mean forward and reverse coverage on k-mers  
2 tiling alleles is calculated. A likelihood is then independently calculated for each allele based  
3 on a Poisson model. An allele *A* in a site is called if: 1) *A* is on the sample mosaic path (i.e.  
4 it is on the maximum likelihood path for that sample); 2) *A* is the most likely allele to be  
5 called based on the previous Poisson model. Every allele not in the sample mosaic path will  
6 not satisfy 1) and will thus not be called. In the uncommon event where an allele satisfies 1),  
7 but not 2), we have an incompatibility between the global and the local choices, and then the  
8 site is genotyped as null.

## 9 Comparison of variant-callers on a diverse set of *E. coli*

### 10 Sample selection

11 We used a set of 20 diverse *E. coli* samples for which matched Nanopore and Illumina data  
12 and a high-quality assembly were available. These are distributed across 4 major  
13 phylogroups of *E. coli* as shown in Figure 4. Of these, 16 were isolated from clinical  
14 infections and rectal screening swabs in ICU patients in an Australian hospital(56). One is  
15 the reference strain CFT073 that was resequenced and assembled by the REHAB  
16 consortium(57). One is from an ST216 cardiac ward outbreak (identifier: H131800734); the  
17 Illumina data was previously obtained(58) and we did the Nanopore sequencing (see below).  
18 The two final samples were obtained from Public Health England: one is a Shiga-toxin  
19 encoding *E. coli* (we used the identifier O63)(59), and the other an enteroaggregative *E. coli*  
20 (we used the identifier ST38)(60). Coverage data for these samples can be found in  
21 Supplementary Table 1.

### 22 PanRG construction

23 MSAs for gene clusters curated with PanX(27) from 350 RefSeq assemblies were  
24 downloaded from <http://pangenome.de> on 3rd May 2018. MSAs for intergenic region clusters  
25 based on 228 *E. coli* ST131 genome sequences were previously generated with Piggy(28)  
26 for their publication. The PanRG was built using *make\_prg*. Two loci (GC00000027\_2 and  
27 GC00004221) out of 37,428 were excluded because the combination of Clustal Omega and  
28 *make\_prg* did not complete in reasonable time (~24 hours) once *de novo* variants were  
29 added.

### 30 Nanopore sequencing of sample H131800734

31 DNA was extracted using a Blood & Cell Culture DNA Midi Kit (Qiagen, Germany) and  
32 prepared for Nanopore sequencing using kits EXP-NBD103 and SQK-LSK108. Sequencing  
33 was performed on a MinION Mk1 Shield device using a FLO-MIN106 R9.4 Spoton flowcell  
34 and MinKNOW version 1.7.3, for 48 hours.

## 1 Nanopore basecalling

2 Recent improvements to the accuracy of Nanopore reads have been largely driven by  
3 improvements in basecalling algorithms(61). All Nanopore data was basecalled with the  
4 methylation-aware, high-accuracy model provided with the proprietary guppy basecaller  
5 (version 3.4.5). In addition, 4 samples were basecalled with the default (methylation  
6 unaware) model for comparison (see Figure 5). Demultiplexing of the subsequent basecalled  
7 data was performed using the same version of the guppy software suite with barcode kits  
8 EXP-NBD104 and EXP-NBD114 and an option to trim the barcodes from the output.

## 9 Phylogenetic tree construction

10 Chromosomes were aligned using *MAFFT*(62) v7.467 as implemented in *Parsnp*(63) v1.5.3.  
11 *Gubbins* v2.4.1 was used to filter for recombination (default settings) and phylogenetic  
12 construction was carried out using *RAxML*(64) v8.2.12 (GTR + GAMMA substitution model,  
13 as implemented in *Gubbins*(65)).

## 14 Reference selection for mapping-based callers

15 A set of references was chosen for testing single-reference variant callers using two  
16 standard approaches, as follows. First, a phylogeny was built containing our 20 samples and  
17 243 reference genomes from RefSeq. Then, for each of our 20 samples, the nearest RefSeq  
18 *E. coli* reference was found using *Mash*(66). Second, for each of the 20 samples, the  
19 nearest RefSeq reference in the phylogeny was manually selected; sometimes one RefSeq  
20 assembly was the closest to more than one of the 20. At an earlier stage of the project there  
21 had been another sample (making a total of 21) in phylogroup B1; this was discarded when  
22 it failed quality filters (data not shown). Despite this, the *Mash*/manual selected reference  
23 genomes were left in the set of mapping references, to evaluate the impact of mapping to a  
24 reference in a different phylogroup to all 20 of our samples.

## 25 Construction of truth assemblies

26 16/20 samples were obtained with matched Illumina and Nanopore data and a hybrid  
27 assembly. Sample H131800734 was assembled using the hybrid assembler *Unicycler*(67)  
28 with PacBio and Illumina reads followed by polishing with the PacBio reads using *Racon*(68),  
29 and finally with Illumina reads using *Pilon*(69). A small 1kb artifactual contig was removed  
30 from the H131800734 assembly due to low quality and coverage.

31 In all cases we mapped the Illumina data to the assembly, and masked all positions where  
32 the pileup of Illumina reads did not support the assembly.

## 33 Construction of a comprehensive and filtered truth set of pairwise SNPs

34 All pairwise comparisons of the 20 truth assemblies were performed with *varifier*  
35 (<https://github.com/iqbal-lab-org/varifier>), using subcommand *make\_truth\_vcf*. In summary,  
36 *varifier* compares two given genomes (referenced as G1 and G2) twice - first using  
37 *dnadiff*(70) and then using *minimap2/pafutils*(53). The two output sets of pairwise SNPs are  
38 then joined and filtered. We create one sequence probe for each allele (a sequence



1 composed of the allele and 50 bases of flank on either side taken from G1) and then map  
2 both to G2 using *minimap2*. We then evaluate these mappings to verify if the variant found is  
3 indeed correct (TP) or not (FP) as follows. If the mapping quality is zero, the variant is  
4 discarded to avoid paralogs/duplicates/repeats that are inherently hard to assess. We then  
5 check for mismatches in the allele after mapping and confirm that the called allele is the  
6 better match.

## 7 Constructing a set of ground truth pan-genome variants

8 When seeking to construct a truth set of all variants within a set of bacterial genomes, there  
9 is no universal coordinate system. We start by taking all pairs of genomes and finding the  
10 variants between them, and then need to deduplicate them - e.g. when a variant between  
11 genomes 1 and 2 is the same as a variant between genomes 3 and 4, they should be  
12 identified; we define “the same” in terms of genome, coordinate and allele. An allele  $A$  in a  
13 position  $P_A$  of a chromosome  $C_A$  in a genome  $G_A$  is defined as a triple  $A = (G_A, C_A, P_A)$ .  
14 A pairwise variant  $P_wV = \{A_1, A_2\}$  is defined as a pair of alleles that describes a variant  
15 between two genomes, and a pan-genome variant  $P_gV = \{A_1, A_2, \dots, A_n\}$  is defined as a set  
16 of two or more alleles that describes the same variant between two or more genomes. A  
17 pan-genome variant  $P_gV$  can also be defined as a set of pairwise variants  
18  $P_gV = \{P_wV_1, P_wV_2, \dots, P_wV_n\}$ , as we can infer the set of alleles of  $P_gV$  from the pairs  
19 of alleles in all these pairwise variants. Note that pan-genome variants are thus able to  
20 represent rare and core variants. Given a set of pairwise variants, we seek a set of  
21 pan-genome variants satisfying the following properties:

- 22 1. [Surjection]:
  - 23 a. each pairwise variant is in exactly one pan-genome variant;
  - 24 b. a pan-genome variant contains at least one pairwise variant;
- 25 2. [Transitivity]: if two pairwise variants  $P_wV_1$  and  $P_wV_2$  share an allele, then  $P_wV_1$   
26 and  $P_wV_2$  are in the same pan-genome variant  $P_gV$ ;

27 We model the above problem as a graph problem. We represent each pairwise variant as a  
28 node in an undirected graph  $G$ . There is an edge between two nodes  $n_1$  and  $n_2$  if  $n_1$  and  
29  $n_2$  share an allele. Each component (maximal connected subgraph) of  $G$  then defines a  
30 pan-genome variant, built from the set of pairwise variants in the component, satisfying all  
31 the properties previously described. Therefore, the set of components of  $G$  defines the set  
32 of pan-genome variants  $P$ . However, a pan-genome variant in  $P$  could: i) have more than  
33 one allele stemming from a single genome, due to a duplication/repeat; ii) represent biallelic  
34 , triallelic or tetraallelic SNPs/indels. For this evaluation, we chose to have a smaller, but more  
35 reliable set of pan-genome variants, and thus we filtered  $P$  by restricting it to the set of  
36 pan-genome variants  $P'$  defined by the variants  $P_gV \in P$  such that: i)  $P_gV$  has at most  
37 one allele stemming from each genome; ii)  $P_gV$  is a biallelic SNP.  $P'$  is the set of 618,305  
38 ground truth filtered pan-genome variants that we extracted by comparing and deduplicating  
39 the pairwise variants present in our 20 samples, and that we use to evaluate the recall of all  
40 the tools in this paper. Supplementary Figure 11 shows an example summarising the  
41 described process of building pan-genome variants from a set of pairwise variants.

## 1 Subsampling read data and running all tools

2 All read data was randomly subsampled to 100x coverage using *rasusa* - the pipeline is  
3 available at <https://github.com/iqbal-lab-org/subsampler>. A *snakemake*(71) pipeline to run  
4 the *pandora* workflow with and without *de novo* discovery (see Figure 2d) is available at  
5 [https://github.com/iqbal-lab-org/pandora\\_workflow](https://github.com/iqbal-lab-org/pandora_workflow). A *snakemake* pipeline to run *snippy*,  
6 *SAMtools*, *nanopolish* and *medaka* on all pairwise combinations of 20 samples and 24  
7 references is available at [https://github.com/iqbal-lab-org/variant\\_callers\\_pipeline](https://github.com/iqbal-lab-org/variant_callers_pipeline).

## 8 Evaluating VCF files

### 9 Calculating precision

10 Given a variant/VCF call made by any of the evaluated tools, where the input were reads  
11 from a sample (or several samples, in the case of *pandora*) and a reference sequence (or a  
12 PanRG, in the case of *pandora*), we perform the following steps to assess how correct a call  
13 is:

- 14 1. Construct a probe for the called allele, consisting of the sequence of the allele  
15 flanked by 150bp on both sides from the reference sequence. This reference  
16 sequence is one of the 24 chosen references for *snippy*, *SAMtools*, *nanopolish* and  
17 *medaka*; or the multi-sample inferred VCF reference for *pandora*;
- 18 2. Map the probe to the sample sequence using *BWA-MEM*(72);
- 19 3. Remove multi-mappings by looking at the Mapping Quality (MAPQ) measure(30) of  
20 the SAM records. If the probe is mapped uniquely, then its mapping passes the filter.  
21 If there are multiple mappings for the probe, we select the mapping  $m_1$  with the  
22 highest MAPQ if the difference between its MAPQ and the second highest MAPQ  
23 exceeds 10. If  $m_1$  does not exist, then there are at least two mappings with the same  
24 MAPQ, and it is ambiguous to choose which one to evaluate. In this case, we prefer  
25 to be conservative and filter this call (and all its related mappings) out of the  
26 evaluation;
- 27 4. We further remove calls mapping to masked regions of the sample sequence, in  
28 order to not evaluate calls lying on potentially misassembled regions;
- 29 5. Now we evaluate the mapping, giving the call a continuous precision score between  
30 0 and 1. If the mapping does not cover the whole called allele, we give a score of 0.  
31 Otherwise, we look only at the alignment of the called allele (i.e. we ignore the  
32 flanking sequences alignment), and give a score of: number of matches / alignment  
33 length.

34 Finally, we compute the precision for the tool by summing the score of all evaluated calls and  
35 dividing by the number of evaluated calls. Note that here we evaluate all types of variants,  
36 including SNPs and indels.

### 37 Calculating recall

38 We perform the following steps to calculate the recall of a tool:

- 1 1. Apply the VCF calls to the associated reference using the VCF consensus builder  
2 ([https://github.com/leoisl/vcf\\_consensus\\_builder](https://github.com/leoisl/vcf_consensus_builder)), creating a mutated reference with  
3 the variants identified by the tool;
- 4 2. Build probes for each allele of each pan-genome variant previously computed (see  
5 Section “Constructing a set of ground truth pan-genome variants”);
- 6 3. Map all pan-genome variants’ probes to the mutated reference using *BWA-MEM*;
- 7 4. Evaluate each probe mapping, which is classified as a TP only if all bases of the  
8 allele were correctly mapped to the mutated reference. In the uncommon case where  
9 a probe multimaps, it is enough that one of the mappings are classified as TP;
- 10 5. Finally, as we now know for each pan-genome variant which of its alleles were found,  
11 we calculate both the pan-variant recall and the average allelic recall as per Section  
12 “*Pandora detects rare variation inaccessible to single-reference methods*”.

### 13 Filters

14 Given a VCF file with likelihoods for each genotype, the genotype confidence is defined as  
15 the log likelihood of the maximum likelihood genotype, minus the log likelihood of the next  
16 best genotype. Thus a confidence of zero means all alleles are equally likely, and high  
17 quality calls have higher confidences. In the recall/error rate plots of Figure 5 and Figures  
18 6a,b, each point corresponds to the error rate and recall computed as previously described,  
19 on a genotype confidence (gt-conf) filtered VCF file with a specific threshold for minimum  
20 confidence.

21 We also show the same plot with further filters applied in Supplementary Figure 1. The filters  
22 were as follows. For Illumina data: for *pandora*, a minimum coverage filter of 5x, a strand  
23 bias filter of 0.05 (minimum 5% of reads on each strand), and a gaps filter of 0.8 were  
24 applied. The gaps filter means at least 20% the minimizer k-mers on the called allele must  
25 have coverage above 10% of the expected depth. As *snippy* has its own internal filtering, no  
26 filters were applied. For *SAMtools*, a minimum coverage filter of 5x was used. For Nanopore  
27 data: for *pandora*, a minimum coverage filter of 10x, a strand bias filter of 0.05, and a gaps  
28 filter of 0.6 were used. For *nanopolish*, we applied a coverage filter of 10x. We were unable  
29 to apply a minimum coverage filter to a *medaka* due to a software bug that prevents  
30 annotating the VCF file with coverage information.

### 31 Locus presence and distance evaluation

32 For all loci detected as present in at least one sample by *pandora*, we mapped the  
33 multi-sample inferred reference to all 20 sample assemblies and 24 references, to identify  
34 their true locations. To be confident of these locations, we employed a strict mapping using  
35 *bowtie2*(73) and requiring end-to-end alignments. From the mapping of all loci to all  
36 samples, we computed a truth locus presence-absence matrix, and compared it with  
37 *pandora*’s locus presence-absence matrix, classifying each *pandora* locus call as true/false  
38 positive/negative. Supplementary Figure 3 shows these classifications split by locus length.  
39 Having the location of all loci in all the 20 sample assemblies and the 24 references, we then  
40 computed the edit distance between them.

## 1 Declarations

### 2 Ethics approval and consent to participate

3 Not applicable

### 4 Consent for publication

5 Not applicable

## 6 Availability of data and materials

### 7 Reproducibility

8 All input data for our analyses, including PanX's and Piggy's MSAs, PanRG, reference  
9 sequences, and sample data are publicly available (see Section "*Data availability*").  
10 *Pandora*'s code, as well as all code needed to reproduce this analysis are also publicly  
11 available (see Section "*Code availability*"). Software environment reproducibility is achieved  
12 using Python virtual environments if all dependencies and source code are in Python, and  
13 using Docker(74) containers run with Singularity(75) otherwise. The exact commit/version of  
14 all repositories used to obtain the results in this paper can be retrieved with the git branch or  
15 tag *pandora\_paper\_tag1*.

### 16 Data availability

- 17 ● Gene MSAs from PanX, and intergenic MSAs from Piggy:  
18 [doi.org/10.6084/m9.figshare.13204163](https://doi.org/10.6084/m9.figshare.13204163);
- 19 ● *E. Coli* PanRG: [doi.org/10.6084/m9.figshare.13204172](https://doi.org/10.6084/m9.figshare.13204172);
- 20 ● Accession identifiers or Figshare links for the sample and reference assemblies, and  
21 Illumina and Nanopore reads are listed in Section D of the Supplementary file;
- 22 ● Input packages containing all data to reproduce both the 4- and 20-way analyses  
23 described in the Results section are also available in Section D of the Supplementary  
24 file.

### 25 Code availability

- 26 ● *make\_prg* (RCC graph construction algorithm): [https://github.com/rmcolq/make\\_prg](https://github.com/rmcolq/make_prg)
- 27 ● *pandora*: <https://github.com/rmcolq/pandora>
- 28 ● *varifier*: <https://github.com/iqbal-lab-org/varifier>
- 29 ● Pangenome variations pipeline taking a set of assemblies and returning a set of  
30 filtered pan-genome variants: [https://github.com/iqbal-lab-org/pangenome\\_variations](https://github.com/iqbal-lab-org/pangenome_variations)
- 31 ● *pandora* workflow: [https://github.com/iqbal-lab-org/pandora\\_workflow](https://github.com/iqbal-lab-org/pandora_workflow)
- 32 ● Run *snippy*, *samtools*, *nanopolish* and *medaka* pipeline:  
33 [https://github.com/iqbal-lab-org/variant\\_callers\\_pipeline](https://github.com/iqbal-lab-org/variant_callers_pipeline)
- 34 ● 4- and 20-way evaluation pipeline (recall/error rate curves etc):  
35 [https://github.com/iqbal-lab-org/pandora\\_paper\\_roc](https://github.com/iqbal-lab-org/pandora_paper_roc)

- 1     • Locus presence and distance from reference pipeline:
- 2       [https://github.com/iqbal-lab-org/pandora\\_gene\\_distance](https://github.com/iqbal-lab-org/pandora_gene_distance)
- 3     • A master repository to reproduce everything in this paper, marshalling all of the
- 4       above: [https://github.com/iqbal-lab-org/paper\\_pandora2020\\_analyses](https://github.com/iqbal-lab-org/paper_pandora2020_analyses)

5 Although all containers are hosted on <https://hub.docker.com/> (for details, see  
6 [https://github.com/iqbal-lab-org/paper\\_pandora2020\\_analyses/blob/master/scripts/pull\\_containers/pull\\_containers.sh](https://github.com/iqbal-lab-org/paper_pandora2020_analyses/blob/master/scripts/pull_containers/pull_containers.sh)), and are downloaded automatically during the pipelines' execution,  
7 we also provide Singularity(75) containers (converted from Docker containers) at  
8 [doi.org/10.6084/m9.figshare.13204169](https://doi.org/10.6084/m9.figshare.13204169).

10 Frozen packages with all the code repositories for *pandora* and the analysis framework can  
11 be found at [doi.org/10.6084/m9.figshare.13204214](https://doi.org/10.6084/m9.figshare.13204214).

## 12 Competing interests

13 The authors declare that they have no competing interests

## 14 Funding

15 RMC was funded by a Wellcome Trust PhD studentship (105279/Z/14/Z), and ZI was  
16 partially funded by a Wellcome Trust/Royal Society Sir Henry Dale Fellowship  
17 (102541/Z/13/Z).

## 18 Authors' contributions

19 RMC designed and implemented the fundamental data structures, and RCC, map and  
20 compare algorithms. MBH designed and implemented the *de novo* variant discovery  
21 component. LL optimised the codebase. RMC, MBH, LL designed and implemented (several  
22 iterations of) the evaluation pipeline, one component of which was written by MH. BL  
23 reimplemented and improved the RCC codebase. JH,SG,LP sequenced 18/20 of the  
24 samples. LWR, MBH, LL, KM, ZI analysed and visualised the 20-way data. ZI designed the  
25 study. ZI and RMC wrote the bulk of the paper, LL and MBH wrote sections, and all authors  
26 read and improved drafts.

## 27 Acknowledgements

28 We are grateful to the REHAB consortium (<https://modmedmicro.nsms.ox.ac.uk/rehab/>) and  
29 the Transmission of Carbapenemase-producing Enterobacteriaceae (TRACE) study  
30 investigators for sharing sequencing data (for CFT073 and H131800734) in support of this  
31 work. We would like to thank Sion Bayliss and Ed Thorpe for discussions and help with  
32 Piggy. We are grateful to Kelly Wyres for sharing sequence data for the Australian samples,  
33 and to Tim Dallman and David Greig for sharing their data from Public Health England. We  
34 would like to thank the following for helpful conversations during the prolonged genesis of  
35 this project: Gil McVean, Derrick Crook, Eduardo Rocha, Bill Hanage, Ed Feil, Sion Bayliss,  
36 Ed Thorpe, Richard Neher, Camille Marchet, Rayan Chikhi, Kat Holt, Claire Gorrie, Rob



- 1 Patro, Fatemeh Almodaresi, Nicole Stoesser, Liam Shaw, Phelim Bradley, and Sorina
- 2 Maciuca.

### 3 References

- 4 1. Lynch M, Ackerman MS, Gout J-F, Long H, Sung W, Thomas WK, et al. Genetic drift,  
5 selection and the evolution of the mutation rate. *Nat Rev Genet.* 2016  
6 Nov;17(11):704–14.
- 7 2. Didelot X, Maiden MCJ. Impact of recombination on bacterial evolution. *Trends*  
8 *Microbiol.* 2010 Jul 1;18(7):315–22.
- 9 3. Rocha EPC. Neutral Theory, Microbial Practice: Challenges in Bacterial Population  
10 Genetics. *Mol Biol Evol.* 2018 Jun 1;35(6):1338–47.
- 11 4. Fraser C, Alm EJ, Polz MF, Spratt BG, Hanage WP. The Bacterial Species Challenge:  
12 Making Sense of Genetic and Ecological Diversity. *Science.* 2009 Feb  
13 6;323(5915):741–6.
- 14 5. Mira A, Ochman H, Moran NA. Deletional bias and the evolution of bacterial genomes.  
15 *Trends Genet.* 2001 Oct 1;17(10):589–96.
- 16 6. Domingo-Sananes MR, McInerney J. Selection-based model of prokaryote  
17 pangenomes | bioRxiv [Internet]. [cited 2020 May 11]. Available from:  
18 <https://www.biorxiv.org/content/10.1101/782573v1>
- 19 7. Gordienko EN, Kazanov MD, Gelfand MS. Evolution of Pan-Genomes of *Escherichia*  
20 *coli*, *Shigella* spp., and *Salmonella enterica*. *J Bacteriol.* 2013 Jun 15;195(12):2786–92.
- 21 8. Lobkovski A, Wolf Y, Koonin, Eugene. Gene Frequency Distributions Reject a Neutral  
22 Model of Genome Evolution | Genome Biology and Evolution | Oxford Academic  
23 [Internet]. [cited 2020 May 11]. Available from:  
24 <https://academic.oup.com/gbe/article/5/1/233/732669>
- 25 9. Bolotin E, Hershberg R. Gene Loss Dominates As a Source of Genetic Variation within  
26 Clonal Pathogenic Bacterial Species. *Genome Biol Evol.* 2015 Aug 1;7(8):2173–87.
- 27 10. Haegeman B, Weitz JS. A neutral theory of genome evolution and the frequency  
28 distribution of genes. *BMC Genomics.* 2012 May 21;13(1):196.
- 29 11. Hadfield J, Croucher NJ, Goater RJ, Abudahab K, Aanensen DM, Harris SR.  
30 Phandango: an interactive viewer for bacterial population genomics. *Bioinformatics.*  
31 2018 Jan 15;34(2):292–3.
- 32 12. Garrison E, Sirén J, Novak AM, Hickey G, Eizenga JM, Dawson ET, et al. Variation  
33 graph toolkit improves read mapping by representing genetic variation in the reference.  
34 *Nat Biotechnol.* 2018 Oct;36(9):875–9.
- 35 13. Maciuca S, Elias C del O, McVean G, Iqbal Z. A natural encoding of genetic variation in  
36 a Burrows-Wheeler Transform to enable mapping and genome inference. *bioRxiv.* 2016  
37 Jul 25;059170.
- 38 14. Eggertsson HP, Jonsson H, Kristmundsdottir S, Hjartarson E, Kehr B, Masson G, et al.  
39 GraphTyper enables population-scale genotyping using pangenome graphs. *Nat Genet.*  
40 2017 Nov;49(11):1654–60.
- 41 15. Eggertsson HP, Kristmundsdottir S, Beyter D, Jonsson H, Skuladottir A, Hardarson MT,  
42 et al. GraphTyper2 enables population-scale genotyping of structural variation using  
43 pangenome graphs. *Nat Commun.* 2019 Nov 27;10(1):5402.
- 44 16. Rautiainen M, Marschall T. GraphAligner: Rapid and Versatile Sequence-to-Graph  
45 Alignment. *bioRxiv.* 2019 Oct 21;810812.
- 46 17. Schneeberger K, Hagmann J, Ossowski S, Warthmann N, Gesing S, Kohlbacher O, et



- 1 al. Simultaneous alignment of short reads against multiple genomes. *Genome Biol.*
- 2 2009 Sep 17;10(9):R98.
- 3 18. Rabbani L, Müller J, Weigel D. An Algorithm to Build a Multi-genome Reference.
- 4 bioRxiv. 2020 Apr 13;2020.04.11.036871.
- 5 19. The Computational Pan-Genomics Consortium. Computational pan-genomics: status,
- 6 promises and challenges | Briefings in Bioinformatics | Oxford Academic [Internet].
- 7 [cited 2020 May 20]. Available from:
- 8 <https://academic.oup.com/bib/article/19/1/118/2566735>
- 9 20. Rautiainen M, Marschall T. Aligning sequences to general graphs in  $O(V + mE)$  time.
- 10 bioRxiv. 2017 Nov 8;216127.
- 11 21. Danecek P, Auton A, Abecasis G, Albers CA, Banks E, DePristo MA, et al. The variant
- 12 call format and VCFtools. *Bioinformatics.* 2011 Aug 1;27(15):2156–8.
- 13 22. Roberts M, Hayes W, Hunt BR, Mount SM, Yorke JA. Reducing storage requirements
- 14 for biological sequence comparison. *Bioinformatics.* 2004 Dec 12;20(18):3363–9.
- 15 23. Touchon M, Perrin A, Sousa JAM de, Vangchhia B, Burn S, O'Brien CL, et al.
- 16 Phylogenetic background and habitat drive the genetic diversification of *Escherichia*
- 17 *coli*. *PLOS Genet.* 2020 Jun 12;16(6):e1008866.
- 18 24. Touchon M, Hoede C, Tenaillon O, Barbe V, Baeriswyl S, Bidet P, et al. Organised
- 19 Genome Dynamics in the *Escherichia coli* Species Results in Highly Diverse Adaptive
- 20 Paths. *PLOS Genet.* 2009 Jan 23;5(1):e1000344.
- 21 25. Decano AG, Downing T. An *Escherichia coli* ST131 pangenome atlas reveals
- 22 population structure and evolution across 4,071 isolates. *Sci Rep.* 2019 Nov
- 23 22;9(1):17394.
- 24 26. Rasko DA, Rosovitz MJ, Myers GSA, Mongodin EF, Fricke WF, Gajer P, et al. The
- 25 Pangenome Structure of *Escherichia coli*: Comparative Genomic Analysis of *E. coli*
- 26 Commensal and Pathogenic Isolates. *J Bacteriol.* 2008 Oct 15;190(20):6881–93.
- 27 27. Ding W, Baumdicker F, Neher RA. panX: pan-genome analysis and exploration. *Nucleic*
- 28 *Acids Res.* 2018 Jan 9;46(1):e5–e5.
- 29 28. Thorpe HA, Bayliss SC, Sheppard SK, Feil EJ. Piggy: a rapid, large-scale pan-genome
- 30 analysis tool for intergenic regions in bacteria. *GigaScience* [Internet]. 2018 Apr 1 [cited
- 31 2020 Jul 3];7(4). Available from:
- 32 <https://academic.oup.com/gigascience/article/7/4/giy015/4919733>
- 33 29. Clermont O, Christenson JK, Denamur E, Gordon DM. The Clermont *Escherichia coli*
- 34 phylo-typing method revisited: improvement of specificity and detection of new
- 35 phylo-groups. *Environ Microbiol Rep.* 2013;5(1):58–65.
- 36 30. Li H, Handsaker B, Wysoker A, Fennell T, Ruan J, Homer N, et al. The Sequence
- 37 Alignment/Map format and SAMtools. *Bioinformatics.* 2009 Aug 15;25(16):2078–9.
- 38 31. Garrison E, Marth G. Haplotype-based variant detection from short-read sequencing.
- 39 ArXiv12073907 Q-Bio [Internet]. 2012 Jul 20 [cited 2020 Jul 3]; Available from:
- 40 <http://arxiv.org/abs/1207.3907>
- 41 32. Snippy [Internet]. Available from: <https://github.com/tseemann/snippy>
- 42 33. Medaka [Internet]. Available from: <https://github.com/Nanoporetech/medaka>
- 43 34. Loman NJ, Quick J, Simpson JT. A complete bacterial genome assembled de novo
- 44 using only nanopore sequencing data. *Nat Methods.* 2015 Aug;12(8):733–5.
- 45 35. Sievers F, Higgins DG. Clustal Omega for making accurate alignments of many protein
- 46 sequences. *Protein Sci Publ Protein Soc.* 2018 Jan;27(1):135–45.
- 47 36. Louca S, Mazel F, Doebeli M, Parfrey LW. A census-based estimate of Earth's bacterial
- 48 and archaeal diversity. *PLOS Biol.* 2019 Feb 4;17(2):e3000106.
- 49 37. Brockhurst MA, Harrison E, Hall JPJ, Richards T, McNally A, MacLean C. The Ecology
- 50 and Evolution of Pangenomes. *Curr Biol CB.* 2019 21;29(20):R1094–103.
- 51 38. Harrison E, Brockhurst MA. Plasmid-mediated horizontal gene transfer is a

- 1 coevolutionary process. *Trends Microbiol.* 2012 Jun 1;20(6):262–7.
- 2 39. Harrison E, Dytham C, Hall JPJ, Guymer D, Spiers AJ, Paterson S, et al. Rapid  
3 compensatory evolution promotes the survival of conjugative plasmids. *Mob Genet*  
4 *Elem.* 2016 May 3;6(3):e1179074.
- 5 40. Loftie-Eaton W, Bashford K, Quinn H, Dong K, Millstein J, Hunter S, et al.  
6 Compensatory mutations improve general permissiveness to antibiotic resistance  
7 plasmids. *Nat Ecol Evol.* 2017 Sep;1(9):1354–63.
- 8 41. Gori A, Harrison OB, Mlia E, Nishihara Y, Chan JM, Msefula J, et al. Pan-GWAS of  
9 *Streptococcus agalactiae* Highlights Lineage-Specific Genes Associated with Virulence  
10 and Niche Adaptation. *mBio* [Internet]. 2020 Jun 30 [cited 2020 Jul 16];11(3). Available  
11 from: <https://mbio.asm.org/content/11/3/e00728-20>
- 12 42. Bonnet R. Growing Group of Extended-Spectrum  $\beta$ -Lactamases: the CTX-M Enzymes.  
13 *Antimicrob Agents Chemother.* 2004 Jan;48(1):1–14.
- 14 43. Louwen R, Staals RHJ, Endtz HP, Baarlen P van, Oost J van der. The Role of  
15 CRISPR-Cas Systems in Virulence of Pathogenic Bacteria. *Microbiol Mol Biol Rev.*  
16 2014 Mar 1;78(1):74–88.
- 17 44. Horvath P, Romero DA, Coûté-Monvoisin A-C, Richards M, Deveau H, Moineau S, et  
18 al. Diversity, Activity, and Evolution of CRISPR Loci in *Streptococcus thermophilus*. *J*  
19 *Bacteriol.* 2008 Feb 15;190(4):1401–12.
- 20 45. Pritt J, Chen N-C, Langmead B. FORGe: prioritizing variants for graph genomes.  
21 *Genome Biol.* 2018 Dec 17;19(1):220.
- 22 46. Norri T, Cazaux B, Kosolobov D, Mäkinen V. Linear time minimum segmentation  
23 enables scalable founder reconstruction. *Algorithms Mol Biol.* 2019 May 17;14(1):12.
- 24 47. Horesh G, Blackwell G, Tonkin-Hill G, Corander J, Heinz E, Thomson NR. A  
25 comprehensive and high-quality collection of *E. coli* genomes and their genes. *bioRxiv.*  
26 2020 Sep 21;2020.09.21.293175.
- 27 48. Lees JA, Vehkala M, Välimäki N, Harris SR, Chewapreecha C, Croucher NJ, et al.  
28 Sequence element enrichment analysis to determine the genetic basis of bacterial  
29 phenotypes. *Nat Commun.* 2016 Sep 16;7(1):1–8.
- 30 49. Earle SG, Wu C-H, Charlesworth J, Stoesser N, Gordon NC, Walker TM, et al.  
31 Identifying lineage effects when controlling for population structure improves power in  
32 bacterial association studies. *Nat Microbiol.* 2016 Apr 4;1(5):1–8.
- 33 50. Jaillard M, Lima L, Tournoud M, Mahé P, Belkum A van, Lacroix V, et al. A fast and  
34 agnostic method for bacterial genome-wide association studies: Bridging the gap  
35 between k-mers and genetic events. *PLOS Genet.* 2018 Nov 12;14(11):e1007758.
- 36 51. Sheppard SK, Jolley KA, Maiden MCJ. A Gene-By-Gene Approach to Bacterial  
37 Population Genomics: Whole Genome MLST of *Campylobacter*. *Genes.* 2012  
38 Jun;3(2):261–77.
- 39 52. MacQueen J. Some methods for classification and analysis of multivariate  
40 observations. In *The Regents of the University of California; 1967* [cited 2020 Jul 6].  
41 Available from: <https://projecteuclid.org/euclid.bsm/1200512992>
- 42 53. Li H. Minimap and miniasm: fast mapping and de novo assembly for noisy long  
43 sequences. *Bioinformatics.* 2016 Jul 15;32(14):2103–10.
- 44 54. Drezen E, Rizk G, Chikhi R, Deltel C, Lemaitre C, Peterlongo P, et al. GATB: Genome  
45 Assembly & Analysis Tool Box. *Bioinformatics.* 2014 Oct 15;30(20):2959–61.
- 46 55. Rizzi R, Sacomoto G, Sagot M-F. Efficiently Listing Bounded Length st-Paths. In: Jan  
47 K, Miller M, Froncek D, editors. *Combinatorial Algorithms*. Cham: Springer International  
48 Publishing; 2015. p. 318–29. (Lecture Notes in Computer Science).
- 49 56. Wyres K, Hawkey J, Mirceta M, Judd LM, Wick RR, Gorrie CL, et al. Genomic  
50 surveillance of antimicrobial resistant bacterial colonisation and infection in intensive  
51 care patients. *medRxiv.* 2020 Nov 4;2020.11.03.20224881.

- 1 57. De Maio N, Shaw LP, Hubbard A, George S, Sanderson ND, Swann J, et al.  
2 Comparison of long-read sequencing technologies in the hybrid assembly of complex  
3 bacterial genomes. *Microb Genomics*. 2019;5(9).
- 4 58. Decraene V, Phan HTT, George R, Wyllie DH, Akinremi O, Aiken Z, et al. A Large,  
5 Refractory Nosocomial Outbreak of *Klebsiella pneumoniae* Carbapenemase-Producing  
6 *Escherichia coli* Demonstrates Carbapenemase Gene Outbreaks Involving Sink Sites  
7 Require Novel Approaches to Infection Control. *Antimicrob Agents Chemother*.  
8 2018;62(12).
- 9 59. Greig D, Dallman T, Jenkins C. Oxford Nanopore sequencing elucidates a novel *stx2f*  
10 carrying prophage in a Shiga toxin producing *Escherichia coli*(STEC) O63:H6  
11 associated with a case of haemolytic uremic syndrome (HUS). *Access Microbiol*.  
12 2019;1(1A):782.
- 13 60. Greig DR, Dallman TJ, Hopkins KL, Jenkins C. MinION nanopore sequencing identifies  
14 the position and structure of bacterial antibiotic resistance determinants in a  
15 multidrug-resistant strain of enteroaggregative *Escherichia coli*. *Microb Genomics*.  
16 2018;4(10):e000213.
- 17 61. Rang FJ, Kloosterman WP, de Ridder J. From squiggle to basepair: computational  
18 approaches for improving nanopore sequencing read accuracy. *Genome Biol*. 2018 Jul  
19 13;19(1):90.
- 20 62. Katoh K, Misawa K, Kuma K, Miyata T. MAFFT: a novel method for rapid multiple  
21 sequence alignment based on fast Fourier transform. *Nucleic Acids Res*. 2002 Jul  
22 15;30(14):3059–66.
- 23 63. Treangen TJ, Ondov BD, Koren S, Phillippy AM. The Harvest suite for rapid  
24 core-genome alignment and visualization of thousands of intraspecific microbial  
25 genomes. *Genome Biol*. 2014 Nov 19;15(11):524.
- 26 64. Stamatakis A. RAxML version 8: a tool for phylogenetic analysis and post-analysis of  
27 large phylogenies. *Bioinformatics*. 2014 May 1;30(9):1312–3.
- 28 65. Croucher NJ, Page AJ, Connor TR, Delaney AJ, Keane JA, Bentley SD, et al. Rapid  
29 phylogenetic analysis of large samples of recombinant bacterial whole genome  
30 sequences using Gubbins. *Nucleic Acids Res*. 2015 Feb 18;43(3):e15.
- 31 66. Ondov BD, Treangen TJ, Melsted P, Mallonee AB, Bergman NH, Koren S, et al. Mash:  
32 fast genome and metagenome distance estimation using MinHash. *Genome Biol*. 2016  
33 Jun 20;17(1):132.
- 34 67. Wick RR, Judd LM, Gorrie CL, Holt KE. Unicycler: Resolving bacterial genome  
35 assemblies from short and long sequencing reads. *PLOS Comput Biol*. 2017 Jun  
36 8;13(6):e1005595.
- 37 68. Vaser R, Sović I, Nagarajan N, Šikić M. Fast and accurate de novo genome assembly  
38 from long uncorrected reads. *Genome Res*. 2017 Jan 5;27(5):737–46.
- 39 69. Walker BJ, Abeel T, Shea T, Priest M, Abouelliel A, Sakthikumar S, et al. Pilon: An  
40 Integrated Tool for Comprehensive Microbial Variant Detection and Genome Assembly  
41 Improvement. *PLOS ONE*. 2014 Nov 19;9(11):e112963.
- 42 70. Kurtz S, Phillippy A, Delcher AL, Smoot M, Shumway M, Antonescu C, et al. Versatile  
43 and open software for comparing large genomes. *Genome Biol*. 2004 Jan 30;5(2):R12.
- 44 71. Köster J, Rahmann S. Snakemake—a scalable bioinformatics workflow engine.  
45 *Bioinforma Oxf Engl*. 2018 15;34(20):3600.
- 46 72. Li H. Aligning sequence reads, clone sequences and assembly contigs with  
47 BWA-MEM. *ArXiv13033997 Q-Bio* [Internet]. 2013 May 26 [cited 2020 Nov 2]; Available  
48 from: <http://arxiv.org/abs/1303.3997>
- 49 73. Langmead B, Salzberg SL. Fast gapped-read alignment with Bowtie 2. *Nat Methods*.  
50 2012 Mar 4;9(4):357–9.
- 51 74. Merkel D. Docker: lightweight Linux containers for consistent development and

- 1 deployment. Linux J. 2014 Mar 1;2014(239):2:2.
- 2 75. Kurtzer GM, Sochat V, Bauer MW. Singularity: Scientific containers for mobility of
- 3 compute. PLOS ONE. 2017 May 11;12(5):e0177459.
